# Supplementary material
Source: publisher figshare collection journal article supplement (https://springernature.figshare.com/ndownloader/files/13353176)
Supplement: Supplementary file 1 [file 13353176]

	comb_tstage	comb_nstage	comb_mstage	comb_chemo	incidence	recover	age_65	sexfemale	race_O	race_B	pire03z1s1d10	pire03z1s1d20	pire03z1s1d30	pire03z1s1d40	pire03z1s1d50	pire03z1s1d60	pire03z1s1d70	pire03z1s1d80	pire03z1s1d90	pire03z2s1d10	pire03z2s1d20	pire03z2s1d30	pire03z2s1d40	pire03z2s1d50	pire03z2s1d60	pire03z2s1d70	pire03z2s1d80	pire03z2s1d90	pire03z3s1d10	pire03z3s1d20	pire03z3s1d30	pire03z3s1d40	pire03z3s1d50	pire03z3s1d60	pire03z3s1d70	pire03z3s1d80	pire03z3s1d90	pire03z1s2d10	pire03z1s2d20	pire03z1s2d30	pire03z1s2d40	pire03z1s2d50	pire03z1s2d60	pire03z1s2d70	pire03z1s2d80	pire03z1s2d90	pire03z2s2d10	pire03z2s2d20	pire03z2s2d30
1	2	0	0	0	1	1	0	0	0	0	5890.7432	5698.2871	5484.4473	5120.9194	4500.7837	3688.1919	2982.52	2576.2241	2276.8481	6095.8945	6003.9043	5948.71	5875.1177	5783.1274	5654.3408	5451.9624	5084.001	4421.6704	6045.5557	5954.6724	5837.8228	5746.9399	5617.1069	5487.2739	5318.4912	5058.8252	4695.293	2672.5093	2504.1331	2388.9282	2291.447	2202.8279	2123.0708	2052.1753	1963.5563	1848.3513	3402.0713	2922.7888	2745.2769
2	2	2	0	0	1	0	0	0	0	0	3760.8459	3309.9451	3049.8098	2859.0442	2720.3054	2581.5667	2460.1702	2321.4314	2182.6926	6818.5933	6609.3223	6295.416	5903.0332	5484.4917	4961.3149	4411.979	3758.0078	2973.2424	6807.2085	6751.1606	6717.5317	6672.6938	6639.0649	6583.0171	6515.7598	6358.8262	6022.5396	2794.4773	2688.1096	2596.9373	2505.7649	2384.2017	2247.4431	2065.0986	1821.9723	1533.2598	3152.4861	2716.4021	2467.2114
3	2	2	0	1	1	0	0	0	0	0	6543.5522	6478.77	6327.6118	6176.4531	6003.7007	5615.0078	5053.5625	4211.394	3239.6614	6971.6787	6802.085	6678.7441	6632.4912	6586.2383	6555.4033	6524.5679	6493.7329	6416.645	7317.48	7295.0762	7278.2734	7264.271	7247.4683	7216.6631	7191.459	7146.6514	7093.4424	3136.9702	2829.2148	2616.1533	2450.439	2308.3979	2190.0305	2095.3367	2047.9896	1976.9691	5814.3154	4399.0059	3352.9077
4	1	2	0	0	1	1	0	0	0	0	5720.543	5382.7559	4791.6274	4116.0527	3419.3662	2954.9084	2701.5679	2532.6743	2406.0039	6216.4292	6132.4482	6069.4629	6006.4771	5859.5107	5628.564	5334.6309	4872.7368	4137.9048	6635.6719	6560.0063	6358.2314	6206.9004	6080.791	5979.9038	5891.6274	5715.0747	5425.0234	2752.0386	2582.6099	2466.6851	2368.5947	2288.3391	2190.249	2109.9932	2002.9857	1878.1436	3026.5498	2796.8821	2590.1809
5	2	2	0	1	1	0	1	0	0	0	6047.0854	5780.771	5344.9839	4836.5649	4110.2529	3480.782	2802.8904	2270.2615	1882.8948	6473.2319	6350.3604	6252.0625	6129.1909	5932.5957	5613.1289	5146.2158	4556.4307	3745.4763	7409.1675	7380.4893	7351.811	7323.1328	7280.1157	7179.7427	6978.9961	6663.5371	6262.0439	2015.7994	1866.6479	1740.4427	1648.6572	1579.8181	1510.9789	1453.6129	1384.7738	1304.4614	2781.8367	2316.877	2006.9039
6	1	2	0	1	1	1	0	0	0	0	4355.6177	1779.2147	1568.4181	1498.1526	1451.3088	1404.4652	1334.1997	1287.356	1193.6686	6480.082	6372.1963	6237.3398	6075.5117	5913.6836	5670.9414	5212.4282	4322.373	2892.8914	7216.2412	7204.2461	7168.2612	7144.2715	7084.2964	7024.3218	6952.3516	6856.3921	6700.4575	3013.7773	2819.9673	2598.4702	2252.3811	1767.8562	1421.7671	1283.3314	1172.5829	1047.9907	3946.0657	2892.0898	2452.9333
7	1	2	0	1	1	0	0	0	0	0	5742.2661	5339.5513	4842.0796	4202.4736	3491.8	2781.1265	2165.2095	1786.1837	1525.6034	6088.0962	5991.4033	5894.7109	5773.8452	5580.46	5338.728	5000.3037	4492.6675	3501.5676	6821.3555	6710.1089	6626.6738	6496.8862	6320.7456	6200.228	6116.793	6005.5464	5838.6763	1801.6642	1619.0048	1491.9374	1404.5785	1341.0448	1277.5111	1221.9191	1166.3271	1102.7933	3910.5278	3110.9641	2577.9216
8	2	2	0	1	1	1	1	0	0	0	5979.3096	5843.1279	5679.7095	5461.8179	5053.272	4426.835	3555.27	2601.9958	1703.1947	6886.2231	6682.3564	6631.3896	6554.9399	6503.9731	6376.5566	6198.1729	5892.373	5306.2563	7315.7446	7300.2871	7284.8291	7269.3711	7253.9131	7246.1846	7230.7266	7215.2686	7153.437	2001.874	1831.8243	1711.7893	1621.7631	1541.7396	1451.7134	1351.6842	1221.6462	1051.5966	4502.75	3675.5593	3068.9529
9	1	0	0	1	1	1	1	0	0	0	6406.0542	6135.6494	5842.7104	5459.6362	5031.4951	4580.8198	4130.1445	3656.9355	3206.2603	6652.2056	6479.4741	6322.4453	6212.5254	6086.9023	5976.9824	5757.1421	5411.6792	4877.7817	6281.0249	6150.5757	6003.8208	5873.3716	5775.5347	5628.7798	5416.8003	5139.5962	4715.6367	2998.7224	2739.9172	2532.873	2377.5901	2248.1875	2118.7849	1963.5018	1834.0992	1704.6967	5343.8828	4334.5591	3694.5
10	1	2	0	1	1	1	0	0	0	0	6528.5083	6350.4253	6053.6196	5737.0269	5380.8604	4965.3325	4549.8052	4055.1292	3501.0923	6763.8281	6641.2993	6575.3218	6547.0459	6528.1953	6499.9194	6481.0688	6424.5171	6311.4131	6594.9609	6569.8276	6553.0723	6539.1094	6525.1465	6513.9761	6500.0132	6488.8428	6458.1245	4789.0557	4245.6367	3815.4304	3475.7939	3249.3694	3068.23	2909.7329	2751.2358	2547.4539	6657.6929	6461.9673	6210.3203
11	2	0	0	1	1	1	1	0	0	1	5939.5747	5558.5718	4987.0664	4320.3105	3653.5549	2891.5483	2224.7925	1819.9766	1677.1003	6057.772	5974.856	5933.3979	5891.9395	5829.7524	5663.9199	5435.9004	5145.6934	4648.1963	6093.938	6024.9297	5990.4253	5964.5474	5947.2949	5921.417	5904.165	5878.2866	5766.1479	2041.157	1840.985	1712.303	1626.5149	1540.7269	1469.2369	1397.7469	1311.959	1197.575	3656.155	2866.854	2408.55
12	1	2	0	1	1	1	0	0	0	0	6987.438	6843.9736	6664.6431	6431.5137	6180.4512	5911.4551	5606.5933	5176.2002	4602.3428	7059.186	6947.8647	6780.8818	6602.7676	6402.3887	6224.2739	6057.2915	5945.9697	5812.3838	6580.6108	6366.3115	6248.0771	6166.791	6092.8945	6018.998	5945.1016	5878.5952	5819.478	3896.426	3623.8176	3453.4373	3283.0569	3146.7524	2993.4102	2805.9919	2584.4973	2277.8127	5078.3901	4588.9268	4140.2515
13	1	2	0	1	1	1	0	1	0	0	5203.7319	4539.8994	4003.7275	3544.1514	3033.5112	2548.4031	2216.4871	1961.167	1756.911	6274.8257	6131.3564	6035.71	5940.0635	5844.417	5677.0361	5414.0083	4959.688	4290.1631	5930.0181	5878.6138	5814.3579	5762.9536	5672.9961	5544.4849	5403.123	5158.9517	4696.3125	1891.1769	1677.6786	1535.3463	1428.5972	1339.6396	1232.8905	1143.9329	1037.1837	912.64301	4639.0767	3519.9375	2728.3513
14	2	2	0	1	1	0	0	0	0	1	7102.3188	6916.623	6730.9277	6503.9663	6297.6377	6091.3091	5905.6138	5678.6523	4956.5024	7415.3579	7368.084	7339.7192	7316.0825	7297.1729	7273.5356	7249.8984	7202.6245	7108.0762	7476.1587	7426.4331	7409.8579	7376.7075	7343.5571	7293.8315	7260.6812	7244.106	7194.3804	5403.9204	4973.6821	4644.6768	4366.2876	4113.2061	3860.125	3607.0437	3278.0381	2873.1082	7059.6919	6815.7959	6571.8999
15	1	2	0	1	1	1	1	0	0	0	4427.0913	3775.2671	3332.0266	2888.7861	2445.5459	2158.7432	1924.0864	1559.0649	1167.9705	6182.147	6014.0435	5797.9102	5533.7476	5197.54	4765.2739	4164.9038	3396.4307	2507.8833	6190.1138	6098.5103	5995.4565	5938.2041	5880.9521	5823.7002	5720.646	5548.8896	5274.0796	1816.0845	1718.1481	1646.9216	1575.6952	1504.4688	1424.339	1317.4993	1175.0464	827.81738	4011.0996	3097.3538	2629.856
16	2	2	0	1	1	1	0	0	0	0	4162.7358	3368.5356	2574.3354	1938.9755	1598.604	1394.3811	1258.2325	1144.7754	1008.6268	6134.417	6059.4282	5984.4399	5859.459	5734.478	5534.5088	5234.5547	4709.6353	3684.7927	6134.8271	6087.6196	6047.1563	6013.437	5972.9736	5939.2544	5892.0474	5817.8643	5662.7554	1452.4547	1332.8066	1261.0177	1197.2053	1109.4634	1013.7448	918.02625	830.28424	726.58917	3183.2275	2135.468	1623.7714
17	3	2	0	1	1	1	0	0	0	0	6092.2598	6039.9668	5961.5273	5817.7217	5517.0371	5294.7925	5033.3276	4824.1558	4418.8857	6689.9976	6457.1226	6206.998	6094.8735	6043.1235	5991.3735	5948.2485	5896.499	5810.249	7362.6074	7314.0649	7287.0972	7265.5225	7233.1611	7200.7993	7157.6509	7076.7466	6947.3008	5142.166	4923.6934	4728.2178	4567.2378	4429.2549	4302.771	4187.7852	4061.301	3911.8196	5965.8003	5735.0806	5576.4604
18	2	2	0	1	1	1	0	0	0	0	6200.7383	6181.4429	6162.1475	6123.5571	6065.6714	5679.7656	3499.4001	3113.4946	2881.9514	6292.0347	6232.8462	6193.3867	6173.6572	6134.1982	6094.7393	5976.3618	5522.5825	4437.458	6300.7007	6248.9736	6180.0039	6128.2769	6059.3071	5921.3677	5679.9736	5266.1553	4662.6704	4127.1436	3842.6077	3558.0718	3248.7937	3026.1135	2828.1755	2642.6086	2457.0417	2246.7327	3532.6003	3004.1003	2690.3032
19	2	2	0	1	1	1	0	0	0	0	5299.0957	4986.6489	4752.314	4533.6016	4346.1338	4158.666	3986.8203	3799.3523	3580.6396	6576.0894	6486.3145	6409.3643	6319.5894	6216.9888	6088.7388	5922.0137	5691.1631	5332.0625	7235.9028	7208.0161	7184.7764	7152.2417	7119.7065	7063.9321	6966.3271	6822.2437	6687.4561	4277.354	4068.0779	3932.6641	3821.8706	3711.0774	3600.2842	3477.1807	3354.0769	3144.8008	5945.9131	5608.0425	5364.0249
20	NA	NA	NA	0	1	1	1	0	0	0	5477.5479	4750.0947	3914.8711	3079.6472	2433.0222	1921.111	1436.1423	1247.5433	1139.7726	6193.1196	6126.0283	6058.9365	5969.4814	5880.0264	5745.8433	5566.9331	5320.9312	4851.291	6120.0898	6041.8896	5992.1255	5942.3618	5899.707	5849.9434	5793.0703	5714.8701	5572.6875	1315.9817	1228.9266	1159.2826	1107.0496	1037.4054	985.17236	915.52826	845.88422	741.41809	4687.5737	3635.2222	2872.2671
21	2	2	0	1	1	1	0	0	0	1	6780.9961	6612.1611	6518.3643	6387.0483	6161.9351	5843.0249	5467.8369	4923.8135	4042.1208	7679.4097	7605.3169	7539.4565	7481.8286	7407.7354	7341.875	7259.5493	7127.8286	6954.9448	7675.3809	7628.2642	7596.853	7561.5156	7534.0308	7502.6196	7455.5034	7392.6812	7259.1841	4147.3716	3487.5371	3275.4475	3134.0542	3016.2266	2898.3992	2780.5715	2662.7439	2450.6541	7055.8774	6685.646	6222.8569
22	2	2	0	1	1	0	0	0	0	0	6125.4639	5976.8213	5806.9448	5615.833	5297.314	4808.918	3938.2986	2876.5679	2515.5796	6603.5469	6466.687	6360.2402	6299.4136	6238.5869	6147.3467	6040.9004	5919.2471	5691.147	7274.5601	7195.9121	7131.564	7052.9155	6945.6685	6824.1216	6724.0239	6595.3271	6409.4316	2703.1353	2436.7969	2268.583	2170.4583	2100.3691	2030.28	1960.191	1876.0841	1763.9415	5153.3062	4558.9624	4091.9783
23	NA	NA	NA	1	1	0	1	0	0	0	7136.2021	7084.1006	7040.0146	6991.9209	6939.8193	6887.7178	6835.6162	6783.5146	6711.374	7228.8921	7208.6665	7185.9126	7165.687	7137.8765	7105.0098	7067.0864	7021.5786	6950.7886	7242.3418	7209.1172	7189.1821	7175.8921	7159.2798	7129.3774	7086.1851	7029.7026	6949.9629	7249.168	7188.395	7144.1968	7094.4731	7028.1753	6928.7285	6818.2324	6707.7358	6558.5659	6917.5103	6799.7153	6723.4951
24	3	2	0	1	1	1	0	0	0	0	2677.375	1761.1991	1547.4248	951.91046	661.78809	615.97931	478.55292	402.20493	325.85693	6125.3071	6084.9448	6044.5825	6004.2202	5943.6772	5842.7715	5640.9604	5257.5195	4510.8184	6616.1563	6534.5234	6457.9922	6386.5635	6325.3389	6264.1138	6197.7871	6146.7661	6065.1333	1011.9215	847.32159	737.58838	646.14398	572.98846	444.96637	390.09973	353.522	307.7998	5238.5952	4612.9976	4035.5225
25	3	2	1	1	1	0	0	0	0	0	5249.9922	4610.6597	3994.1606	3446.1614	3035.1621	2646.9958	2327.3296	2053.3301	1870.6636	6137.147	6035.958	5955.0068	5833.5801	5712.1533	5530.0132	5246.6841	4821.6899	4072.8914	7365.1255	7162.1758	6996.126	6737.8267	6497.9771	6331.9272	6202.7778	6018.2783	5741.5288	1945.423	1862.9786	1818.5854	1780.5343	1742.483	1691.748	1641.0131	1533.2012	1374.6544	3793.5891	2895.9526	2458.6423
26	1	2	0	0	1	1	0	0	0	0	5716.2358	5318.6104	4896.1328	4448.8042	4001.4751	3454.7397	2883.1528	2286.7144	1839.3854	6038.1187	5931.875	5790.2173	5613.145	5400.6582	5170.4639	4904.8555	4550.7109	4037.2009	6108.5244	6054.2979	6000.0713	5956.6899	5891.6177	5815.7002	5685.5562	5512.0308	5251.7422	2015.9481	1833.8721	1697.3149	1591.1039	1500.0658	1424.2008	1333.1627	1242.1246	1135.9136	3679.7417	2990.4609	2617.877
27	2	2	1	1	1	0	0	0	0	0	5133.0254	4667.3984	4246.1172	3802.6628	3403.5542	3070.9636	2804.8911	2605.3369	2272.7463	5599.3066	5492.5361	5385.7661	5207.8159	4958.6851	4673.9644	4282.4736	3837.5977	3339.3367	5793.5957	5676.6196	5572.6406	5494.6563	5390.6772	5273.7012	5104.7354	4844.7881	4428.8721	2410.7485	2218.7173	2037.3542	1909.3334	1813.3177	1685.2969	1525.2706	1375.913	1194.55	2781.9045	2621.6963	2481.5139
28	3	0	0	1	0	NA	0	0	0	0	818.0296	752.66589	644.81567	514.0882	484.67453	393.16531	376.82437	363.75162	317.99701	5456.2041	4767.0806	4633.7017	3611.1316	3411.0635	2499.6421	2299.574	1565.9911	1388.1527	5665.1265	5647.0591	5636.896	5622.2163	5591.7271	5546.5586	5527.3618	5509.2939	5492.356	519.34595	452.21045	417.62552	387.10938	358.62769	340.31799	324.04272	307.76746	287.42337	3971.189	3078.032	2532.2139
29	NA	NA	NA	0	0	NA	1	0	0	1	367.69562	340.2392	326.51099	315.27881	297.80655	284.07834	267.8541	250.38182	236.65361	2126.7251	1889.9688	1640.7517	1391.5345	1167.2393	843.25696	706.18756	494.35303	419.58789	3250.1506	3043.8359	2883.3689	2757.2878	2631.2065	2516.5874	2413.4299	2333.1965	2241.501	436.23007	394.15424	323.52698	303.99176	278.44574	260.41324	242.38075	224.34825	201.80763	2107.7534	1822.6825	1643.1935
30	2	2	0	1	1	0	0	0	0	0	4622.3569	3830.9209	3323.5898	2856.8457	2532.1538	2227.7554	2004.5298	1862.4772	1761.011	6324.52	6214.9937	6127.3726	6017.8457	5864.5088	5645.4556	5338.7813	4900.6753	4155.895	6997.2349	6779.7593	6544.1611	6326.6855	6181.7021	6072.9644	5891.7349	5638.0137	5239.3086	1900.4139	1818.1334	1756.423	1684.4275	1622.717	1561.0066	1489.0111	1406.7305	1273.0245	2804.0967	2376.9985	2153.2805
31	NA	NA	0	1	1	0	1	0	0	0	6105.4395	5571.2383	5126.0708	4502.8359	3545.7256	3100.5581	2900.2327	2744.4241	2566.3569	6594.6943	6408.5723	6263.8101	6098.3682	5953.606	5767.4839	5457.2798	5002.3135	4237.1436	6586.6191	6494.3101	6428.3755	6349.2539	6256.9453	6151.4497	6019.5801	5821.7759	5465.728	2941.6648	2656.4282	2462.4673	2279.9158	2120.1831	1971.8601	1834.9465	1709.4424	1572.5288	3219.7786	2830.7629	2530.1597
32	0	2	0	1	1	1	0	0	0	0	5492.5791	4935.0801	4356.9326	3923.3225	3489.7122	3159.3423	2890.917	2622.4915	2395.3623	5974.5142	5922.105	5869.6958	5764.8774	5642.5894	5432.9526	5153.437	4716.6938	4070.314	6166.2915	6129.2651	6082.9814	6064.4683	6045.9551	6018.1851	5990.415	5944.1313	5796.0249	2522.3137	2260.2134	2072.999	1923.2275	1785.9369	1686.0892	1611.2035	1536.3177	1448.9509	3620.1372	2917.0645	2576.8679
33	2	0	0	0	1	0	0	0	0	0	6596.1187	6497.8862	6427.7202	6357.5542	6287.3887	6217.2227	6147.0566	6076.8906	5726.061	6676.3296	6568.2817	6516.8301	6470.5239	6424.2178	6367.6211	6311.0244	6249.2827	6161.8154	6682.1826	6546.1597	6484.7295	6436.4634	6401.3604	6375.0332	6344.3184	6300.4399	6256.5615	5821.7104	5537.8462	5297.6538	5079.2969	4839.1045	4620.7476	4380.5547	4140.3623	3856.4983	6164.4487	6114.9604	6090.2158
34	2	2	0	1	1	1	0	0	0	0	5935.5889	5622.3257	5230.7466	4682.5356	3847.167	2907.3772	2098.114	1837.0612	1602.1138	6353.0386	6231.4741	6085.5962	5939.7188	5745.2153	5477.7729	5088.7661	4529.5688	3678.6162	7271.9365	7256.6323	7210.7192	7134.1973	6996.458	6874.0229	6675.0664	6506.7188	6154.7183	1890.5376	1718.3026	1611.6809	1505.0593	1414.8411	1324.6227	1242.6061	1135.9844	1012.9595	3055.8542	2456.7134	2097.2288
35	1	0	0	0	1	1	0	0	0	0	67.606865	65.232597	63.333183	61.275486	57.951508	55.89381	53.202972	50.986992	47.50473	142.11678	117.83391	108.2942	100.92262	96.152771	91.382919	86.179451	81.409599	75.772507	309.24872	290.87991	278.63403	266.38815	243.6458	229.65051	206.90817	194.66229	174.54407	60.492012	57.440067	54.622887	51.570938	48.518993	45.701813	42.4151	39.597919	35.841675	109.47516	95.216377	86.537117
36	NA	NA	NA	0	1	1	0	0	0	0	6967.2686	6949.1982	6929.6221	6910.0459	6884.4463	6855.835	6828.7295	6801.624	6770.001	6886.4795	6855.396	6829.4937	6803.5908	6782.8687	6762.147	6736.2441	6642.9946	6513.4814	5780.6626	3633.4758	3433.0715	1772.5803	741.93054	684.67218	455.63892	398.38058	341.12228	6917.3608	6874.5835	6839.8267	6813.0908	6789.0288	6772.9873	6754.272	6730.2095	6695.4531	6907.4536	6864.1353	6835.2563
37	2	2	0	1	1	1	0	0	0	0	5028.9736	3828.5325	3028.2383	2147.9146	1827.7969	1507.6791	947.47314	707.38489	467.2966	6706.9189	6381.7666	6081.6265	5856.5215	5706.4512	5556.3809	5281.2524	4781.0186	3905.6094	7744.6167	7636.835	7587.8433	7538.8516	7450.666	7333.0859	7244.9009	7107.7241	6803.9751	1536.0405	1319.8915	1178.9247	1066.1512	972.1734	868.79773	727.83093	530.47748	408.30624	3400.1128	2660.9287	2291.3367
38	4	0	0	1	1	1	0	1	0	0	284.80286	276.89249	251.57936	245.25108	215.19174	195.41586	180.38618	176.43102	159.81927	2816.8467	1914.7804	1422.7443	889.70508	623.18549	438.67191	377.16739	356.66586	336.16437	5773.6807	5615.147	5491.8428	5403.7686	5315.6943	5139.5454	4875.3228	4523.0254	3994.5796	262.19507	243.98457	235.3129	217.10239	208.43073	196.29039	182.41571	174.61121	161.6037	1015.5132	728.18335	545.3371
39	3	2	0	1	1	1	0	1	0	0	5450.1221	4822.6206	4311.3237	3846.5078	3474.6553	3126.0435	2777.4316	2405.5791	2080.208	5986.043	5843.2178	5679.9888	5475.9526	5210.7051	4884.2476	4516.9819	4088.5059	3517.2043	5924.1162	5862.0254	5812.353	5762.6802	5700.5894	5613.6626	5526.7354	5352.8809	5042.4272	1993.4926	1847.6534	1729.5933	1632.3672	1535.1412	1451.8046	1375.4127	1292.076	1187.9053	2857.1196	2261.6257	2032.5896
40	4	1	0	1	1	0	0	0	0	0	7097.4253	6703.0146	6055.0542	5266.2329	4336.5508	3744.9351	3266.0078	2899.7695	2420.8423	7218.918	7050.5791	6854.1841	6573.6191	6208.8853	5675.813	5002.458	4216.8774	3291.0142	7092.4409	6976.8564	6846.8237	6716.7915	6557.8628	6384.4858	6240.0054	6095.5244	5951.0439	2748.2432	2444.5154	2206.8152	2008.7317	1837.0593	1705.0038	1586.1537	1480.5092	1361.6591	2963.7939	2568.1841	2311.0378
41	NA	NA	1	0	0	NA	0	1	0	1	43.674984	41.931343	40.290268	38.854324	37.418385	36.085011	34.75164	32.90543	31.059221	75.097725	70.745056	67.183784	63.028973	59.467701	54.917187	51.355919	48.58604	45.618313	138.02338	124.33942	115.3471	106.74575	104.39993	93.06179	91.49791	85.242386	82.896561	44.785362	43.451019	41.388851	39.205379	37.385818	35.081043	32.29105	29.743666	26.953672	75.648232	68.841797	64.915001
42	4	2	0	1	1	0	0	0	0	1	6910.7451	6506.8042	6165.0073	5698.9214	5139.6182	4487.0977	3710.2871	2871.3323	2032.3772	7383.2783	7184.3994	7021.6802	6895.1211	6786.6416	6696.2422	6605.8428	6479.2832	6081.5254	7583.9321	7544.7241	7518.585	7492.4463	7466.3076	7453.2383	7414.0298	7348.6826	7139.5718	2662.3459	2257.3328	1922.7565	1711.4453	1570.571	1447.3062	1341.6505	1235.9949	1112.73	5514.3696	4560.8857	3837.553
43	3	2	0	1	1	1	1	0	0	0	552.8161	537.7464	400.23523	394.58411	366.3284	311.70068	302.2821	270.25897	240.11954	6268.0708	5874.9888	5270.2471	4816.6909	3728.156	3214.1257	2004.6426	1611.5605	855.63361	7229.7681	7139.8281	6979.9351	6790.062	6750.0889	6690.1289	6630.1689	6570.209	6480.269	466.73953	431.47488	363.01999	342.27606	300.78824	284.19312	267.59799	248.92847	226.11017	2749.7373	2105.3015	1744.4175
44	NA	NA	NA	1	0	NA	1	1	0	0	5620.0117	5097.2466	4487.3545	3993.6321	3383.7395	3006.1873	2454.3796	1844.4873	1263.6375	6265.8945	6132.0332	5975.8613	5886.6206	5775.0693	5641.208	5440.4155	5038.8311	4302.5928	5988.2065	5956.0474	5923.8887	5896.3237	5854.9766	5818.2236	5772.2822	5717.1528	5620.6763	886.01758	719.05109	640.47864	591.37091	552.08466	512.79846	473.51221	434.22598	375.29666	2788.2817	1794.8156	1347.7556
45	2	2	0	0	1	1	1	0	0	0	4801.4629	3843.5654	2859.0598	1954.3789	1395.6053	996.48145	757.00714	517.53278	357.88318	6325.2959	6241.001	6044.314	5791.4307	5538.5469	5398.0562	5088.9761	4386.522	3065.908	6230.4009	6194.2813	6170.8032	6154.5493	6141.9072	6129.2651	6113.0112	6094.9512	6060.6372	981.87946	795.45197	710.00604	640.09576	577.95325	500.27515	430.36487	368.22238	313.84769	4779.0938	3583.8306	2709.2476
46	NA	NA	NA	1	1	1	0	0	0	1	3565.0083	3210.7004	3015.8311	2803.2463	2643.8079	2502.0847	2360.3616	2218.6384	2059.2	6697.9731	6566.7627	6383.0674	6041.9194	5569.561	4992.2334	4257.4536	3391.4624	2472.9873	7233.9038	7074.4458	6934.9199	6815.3267	6715.6655	6596.0718	6376.8169	6037.9688	5519.73	2854.8289	2487.3171	2211.6836	1991.1765	1825.7963	1678.7916	1531.787	1311.2799	925.3927	2255.0173	1909.0504	1724.5347
47	3	0	0	1	1	1	0	0	0	0	6541.6035	5956.9561	5430.7734	4875.3584	4290.7109	3676.8311	3033.7188	2449.0713	1952.121	7211.7935	7029.5513	6795.2402	6665.0674	6586.9634	6456.7905	6196.4448	5779.8916	4920.7505	7045.3296	6872.8105	6738.6294	6642.7856	6566.1104	6489.4355	6393.5918	6316.9165	5952.71	2395.552	2189.2834	1983.015	1835.6804	1717.8127	1570.4781	1423.1436	1334.7428	1216.8751	5107.0283	3505.9087	2673.3267
48	0	2	0	1	1	1	0	0	0	0	6913.7642	6725.376	6285.8032	5940.4248	5218.27	4496.1152	3742.5623	3051.8054	2078.4661	7293.4844	7172.166	7020.5181	6919.4189	6828.4302	6757.6611	6676.7822	6565.5737	6383.5962	7271.7227	7228.4531	7196.0005	7152.7305	7104.0518	7028.3296	6941.79	6844.4326	6709.2144	3288.5808	2493.3489	2082.022	1807.804	1588.4297	1423.8989	1259.3682	1067.4155	793.19763	5910.418	5369.8311	4829.2437
49	3	1	0	1	0	NA	0	1	0	1	510.22424	479.49863	457.55179	389.51654	365.375	297.33975	286.36633	249.05669	220.52577	6029.3013	5147.5684	4296.2397	3444.9114	2745.6057	2198.323	1681.4451	1286.1853	890.92566	7082.249	6970.6914	6883.9238	6797.1567	6710.3896	6623.6226	6499.6699	6313.7402	5991.4624	369.65793	325.49628	290.16699	265.87808	239.38112	217.30031	188.59525	159.8902	124.56089	3357.5049	2396.1755	1945.5522
50	1	1	0	0	1	1	0	0	0	0	4793.5571	4134.04	3474.5232	2788.6257	2102.7283	1654.2567	941.97845	493.50699	387.98428	7129.6211	6968.0776	6860.3818	6725.7622	6591.1426	6348.8271	6025.7397	5621.8809	4841.0864	7304.0933	7271.4043	7238.7153	7216.9229	7195.1304	7167.8896	7140.6489	7102.5117	7042.582	1641.276	1465.1742	1314.2297	1163.2853	987.18347	811.0816	572.0863	433.72055	383.40573	4963.9282	3739.4001	2998.9875
51	2	2	0	1	1	1	0	0	0	0	5514.4766	5203.8662	4845.4697	4415.3936	3889.7454	3292.418	2742.8765	2169.4421	1667.6869	5666.5459	5569.7925	5434.3379	5202.1304	4950.5718	4602.2598	4195.896	3731.4802	3209.0125	5697.1313	5527.3745	5311.3198	5064.4004	4802.0483	4539.6963	4261.9121	3999.5601	3675.4783	1421.9871	1310.1455	1241.3199	1198.304	1155.288	1120.8752	1077.8593	1026.2401	948.81128	2099.0486	1736.0344	1596.4137
52	4	0	0	1	0	NA	0	0	0	0	4677.2173	4453.1865	4308.2256	4163.2646	4057.8389	3939.2344	3781.0952	3570.2429	3319.856	5035.6494	4622.7256	4288.4536	4032.8342	3796.8777	3541.2581	3265.9753	3010.356	2735.0732	2886.2366	2337.7517	1846.0067	1278.6086	1032.7362	749.03717	635.55756	559.90448	503.16467	4346.0703	4052.5425	3845.3467	3655.417	3482.7537	3310.0903	3102.8943	2861.1655	2567.6379	3612.3901	3422.2791	3261.4158
53	1	2	0	1	1	1	0	0	0	0	5779.1816	5710.3936	5504.0293	5160.0894	4632.7139	3944.8335	3027.6592	2339.7786	1904.1207	7732.6113	7607.7651	7451.707	7170.8027	6858.6865	6390.5127	5922.3389	5298.1069	4268.124	7837.5396	7790.4365	7739.9692	7699.5952	7598.6602	7571.7441	7544.8281	7514.5474	7467.4443	1964.4596	1661.005	1476.7648	1379.2257	1314.1997	1238.3361	1162.4724	1075.7711	999.90747	4788.731	3703.8674	3010.7603
54	3	0	0	1	1	1	1	0	0	0	4325.1416	3061.0105	2440.437	1681.9581	1061.3845	670.65308	440.81104	371.8584	325.88998	6059.5215	5828.541	5759.2471	5666.8545	5574.4624	5435.8745	5204.894	4858.4233	4119.2861	6751.5083	6650.1133	6582.5166	6526.186	6492.3877	6447.3232	6390.9927	6278.3315	6053.0093	918.22986	737.05621	603.14526	484.98856	398.3403	358.95471	319.56915	288.0607	256.55225	3502.2305	2908.0237	2542.3579
55	1	2	0	1	1	1	0	0	0	0	6130.6572	5495.1738	4700.8203	3588.7246	2699.0483	2031.7911	1523.4047	1046.7924	697.27661	7061.125	6893.0093	6780.9321	6668.855	6528.7588	6248.5659	5856.2959	5295.9102	4315.2349	7428.2012	7318.6924	7227.4346	7154.4287	7063.1714	6990.1655	6844.1533	6606.8838	6314.8599	1259.1885	1184.9469	1092.145	952.94202	832.29944	748.77771	693.0965	628.13513	563.17377	3945.3093	2789.1572	2198.2351
56	1	2	0	1	1	1	1	0	0	0	1634.5323	1109.9844	893.3233	699.46857	562.63	471.40424	380.1785	334.56564	300.35599	6074.6157	5766.2378	5485.894	5149.4814	4785.0347	4336.4844	3775.7969	3074.9375	2205.8716	7197.3589	7115.8091	7034.2593	6966.3013	6871.1597	6762.4268	6626.5103	6477.0024	6164.395	763.59546	645.375	557.80426	496.50476	426.44818	373.90576	343.25601	312.60626	281.95651	3664.1819	2978.176	2484.252
57	3	0	0	0	1	1	0	0	0	0	205.26221	193.52502	186.30214	166.43921	141.15913	122.19906	100.53041	76.153183	52.678818	791.64056	448.71915	397.64575	353.86853	331.97995	302.79514	266.31415	251.72173	222.53693	5925.7329	5890.9326	5873.5322	5838.7314	5751.7295	5577.7261	5281.9204	4516.3052	3402.6833	178.65344	161.84001	148.08357	136.61987	125.92041	113.69247	96.114792	78.537117	61.723686	642.83588	407.66559	354.21777
58	4	1	0	1	1	1	0	0	0	0	7428.9785	7252.0493	7049.8442	6847.6392	6620.1587	6316.8516	5912.4419	5406.9292	4218.9756	7336.3481	7074.2827	6859.8657	6621.6245	6407.2075	6145.1421	5811.605	5311.2983	4572.751	5975.9116	5867.1157	5758.3198	5680.6084	5587.355	5478.5591	5323.1362	5105.5449	4732.5308	3856.47	3383.6804	3005.4487	2674.4961	2414.4617	2154.4275	1918.0326	1728.9167	1563.4404	3048.1084	2615.9575	2327.8569
59	4	2	0	1	1	1	1	0	0	0	5699.8218	5383.0942	5066.3662	4720.8452	4317.7373	3857.0422	3194.7932	2330.9902	1409.6003	6746.249	6523.3716	6300.4946	6055.3301	5832.4531	5609.5762	5319.8359	4896.3696	4294.6016	7533.8276	7369.6611	7267.0571	7143.9321	7082.3696	6918.2031	6712.9946	6405.1826	5789.5576	1706.3983	1387.0168	1185.3022	1050.8258	949.96851	865.92072	798.6825	731.44434	681.01569	3115.1719	2492.3047	2047.3993
60	2	2	0	1	1	0	0	0	0	0	5124.1909	4774.1792	4564.1729	4144.1592	3794.1477	3257.4639	2674.1116	1834.0846	877.38708	5561.1543	5434.2139	5345.3555	5269.1909	5205.7207	5078.7803	4888.3696	4596.4063	4228.2788	5568.0737	5471.2705	5385.2231	5277.6636	5148.5928	4987.2539	4772.1353	4503.2368	4148.2915	2885.4102	2584.2903	2407.1609	2265.4573	2088.3279	1911.1984	1663.217	1202.6805	795.28284	3271.0325	2882.5234	2660.5183
61	2	2	0	1	1	1	0	0	0	0	3747.6633	3006.313	2503.2539	2053.1484	1708.9501	1444.1821	1152.9374	888.16937	649.87817	7309.7998	7219.5088	7038.9263	6798.1499	6497.1792	6075.8203	5534.0732	4871.938	3878.7351	7314.8887	7294.1353	7279.311	7264.4868	7252.6274	7237.8037	7220.0146	7196.2959	7142.9292	919.51288	788.16418	717.43793	656.81549	616.40045	565.88177	525.4668	474.94803	414.32556	4990.3208	3780.9443	2996.4836
62	1	1	0	1	1	1	0	1	0	1	7355.1538	6904.5703	6423.9473	5853.208	5192.3516	4441.3784	3720.4443	2939.4324	2398.7319	7498.5259	7389.7012	7199.2578	6954.4019	6627.9277	6138.2163	5566.8862	4859.5254	3798.4841	7521.4312	7438.146	7327.0991	7188.29	6938.4341	6660.8164	6216.6284	5550.3462	4550.9229	3695.9895	3268.5652	2902.2017	2576.5449	2271.2419	2006.6461	1803.1107	1579.2218	1375.6865	3712.304	3078.6235	2591.1768
63	1	0	NA	0	0	NA	0	1	0	0	1506.5715	1010.7379	953.52631	896.3147	800.9621	533.97473	171.63474	19.070526	0	785.6864	739.93616	699.5683	664.58282	632.28851	599.9942	570.39111	532.71448	486.9642	443.18155	397.07016	353.52054	315.09439	271.54477	230.55687	176.76027	128.08716	79.414032	3.3016503	1.1005501	1.1005501	1.1005501	1.1005501	0	0	0	0	350.43185	233.62123	140.77176
64	2	2	0	1	1	1	0	0	0	0	3537.7117	2544.1575	1986.7979	1550.6033	1259.8069	1017.4766	799.37939	605.51514	387.41791	6716.9106	6638.1748	6506.9478	6375.7207	6192.0034	5982.0405	5614.605	5115.9429	4144.8643	7540.4292	7409.8203	7297.8691	7195.2476	7120.6138	7027.3213	6952.6875	6850.0659	6682.1396	1100.2335	957.92072	849.09326	757.00848	681.66638	606.32434	539.35358	455.64014	363.55536	4752.5142	3839.1089	3147.1353
65	2	2	0	1	1	1	0	0	0	1	4831.5894	4121.6758	3138.7188	2538.0227	1964.6311	1473.1526	1172.8046	763.23914	462.89111	6648.9512	6522.5728	6446.7461	6320.3677	6168.7139	6017.0601	5789.5796	5435.7207	4728.0029	7216.6514	7178.7622	7148.4507	7118.1396	7080.2505	7034.7837	6959.0054	6845.3384	6693.7822	1361.5695	1146.8253	982.60919	868.92108	729.96893	641.54486	515.22473	414.16864	325.74457	4802.5181	3870.5232	3124.9272
66	NA	NA	NA	1	0	NA	1	0	0	1	4436.4751	4231.1069	4040.4082	3864.3787	3703.0181	3541.6575	3380.2969	3204.2673	3013.5684	4138.1475	3784.9556	3490.6289	3235.5459	3000.0845	2764.6233	2411.4314	1960.1305	1508.8297	1234.4365	1041.14	923.48132	847.84357	730.18488	587.31354	545.2926	410.82547	360.4003	5764.4199	5426.1035	5087.7866	4730.6748	4373.563	3978.8604	3621.7483	3264.6362	2945.1152	4478.0396	3914.1667	3467.7676
67	2	1	0	1	0	NA	1	1	0	0	5185.1445	5134.5259	4552.4072	4451.1694	4324.6221	3717.1941	3540.0276	2654.1953	1262.1733	6600.4282	6558.2998	6495.1074	6389.7866	6284.4653	6115.9517	5884.2456	5778.9248	5441.8975	6774.7715	6744.1807	6701.353	6658.5259	6627.9351	6572.8711	6517.8076	6462.7437	6364.853	2866.1855	2376.2478	2013.3311	1741.1436	1559.6851	1396.3726	1233.0601	1069.7474	851.99738	4790.3936	4203.6821	3714.7563
68	2	2	0	1	1	1	0	0	0	0	6224.3403	5809.0078	5275.0093	4770.6772	3940.0125	3228.0144	2367.6831	1507.3521	914.0202	6778.7573	6712.7383	6630.2148	6531.186	6432.1577	6333.1294	6184.5869	5953.5205	5689.4448	6190.3975	5949.5762	5811.9644	5743.1582	5657.1504	5536.7402	5330.3218	5055.0977	4521.8511	2079.021	1820.8542	1648.743	1505.317	1390.5762	1275.8353	1175.4371	1060.6963	902.92773	3659.3958	2775.4968	2488.2295
69	3	2	0	1	1	1	0	1	0	1	3136.8171	2559.2974	2139.2832	1631.7659	1334.2557	809.23785	581.7301	441.72537	336.72177	5687.7637	5586.5791	5485.395	5367.3467	5232.4341	5063.7935	4793.9688	4439.8237	3950.7661	6210.4282	6183.9619	6146.9087	6104.562	6046.3354	5966.9355	5898.1226	5802.8428	5659.9229	1304.4452	1124.0431	964.86469	826.9101	699.56744	561.61285	444.88208	359.98694	296.31561	4455.9204	3852.4707	3360.7708
70	1	2	0	1	1	1	0	0	0	0	3279.1572	2315.0198	1637.5179	1298.7668	1038.1892	829.72705	673.38043	569.14935	438.8605	7604.2378	7232.6626	6827.3081	6354.3945	5847.7017	5239.6694	4564.0786	3753.3696	2773.7629	7882.478	7806.5425	7730.6064	7669.8574	7593.9219	7502.7988	7396.4883	7183.8682	6743.4399	1184.0764	1009.6416	887.53723	800.31982	730.5459	634.60675	573.55457	503.78064	425.28497	3488.7861	3031.0056	2725.8186
71	4	0	0	1	1	1	0	0	0	1	5429.7065	4952.3945	4570.5444	4265.0649	3997.77	3749.5676	3463.1802	3195.8855	2852.2207	5587.7192	5273.9526	5043.8569	4813.7612	4541.8301	4228.0635	3851.5435	3433.1877	2931.1611	6510.6084	6445.3413	6412.708	6298.4907	6053.7393	5760.0376	5498.9692	5172.6343	4666.8145	3968.2471	3518.2053	3218.1775	2880.6462	2580.6184	2355.5974	2149.3284	1943.0592	1736.7902	3074.1484	2535.8105	2212.8076
72	3	2	0	1	1	1	0	0	0	0	7138.3994	7054.0459	6969.6919	6892.3677	6808.0142	6730.6899	6646.3359	6554.9531	6421.3931	7253.5146	7203.7539	7172.6538	7141.5537	7113.5635	7085.5728	7060.6929	7035.8125	6995.3818	7268.9717	7223.2485	7194.1519	7169.2119	7148.4287	7127.645	7106.8618	7084.0005	7050.7471	7216.3359	7176.793	7143.8403	7104.2969	7064.7539	7018.6201	6965.896	6873.6284	6761.5898	7284.4668	7231.9956	7202.8447
73	2	2	0	1	0	NA	0	0	0	0	5226.6089	4285.5	3314.0325	2615.79	1887.1895	1431.814	794.28845	490.70483	369.27139	7082.8696	6875.5166	6668.1641	6383.0537	6020.1865	5605.481	5087.0991	4439.1216	3609.7107	7182.9766	7141.832	7100.687	7059.5425	6997.8252	6874.3906	6668.6665	6298.3633	5578.3291	1519.8208	1349.3069	1168.7627	988.21851	777.58362	657.22083	506.7673	376.3743	306.16266	2323.1907	2005.6014	1862.6863
74	2	2	0	1	1	1	0	1	0	0	1781.605	1387.6176	1185.8191	1051.2869	878.31677	705.34674	484.32941	465.1105	349.79712	5490.646	5295.7358	4970.8848	4602.7207	4212.8999	3671.4819	3195.0342	2740.2429	2242.1384	6331.4424	6194.4829	6040.4033	5946.2432	5877.7632	5800.7236	5749.3638	5663.7637	5518.2441	993.02582	886.42957	820.44135	739.2251	658.00891	586.9447	454.96832	353.44803	317.91592	3284.4294	2738.0476	2432.074
75	1	0	0	1	1	1	1	0	0	1	58.781895	47.945866	41.602825	39.224182	36.316956	35.259781	26.802393	18.609299	16.230658	113.75603	106.94398	101.92458	96.905182	92.244308	87.941963	82.205505	76.110519	71.091118	169.92274	161.39583	155.85335	150.7372	145.19472	140.07857	132.40436	126.00918	118.33496	47.895081	43.521244	40.141464	37.159302	35.171196	31.194981	26.622334	24.634226	16.284176	122.63261	117.49568	111.84506
76	1	2	0	1	1	1	0	0	0	0	5187.2656	4220.0576	3408.8508	2691.2449	2160.8403	1755.2369	1412.0341	1068.8312	756.82855	7669.9854	7549.2666	7428.5479	7156.9312	6824.9546	6432.6187	5979.9238	5376.3306	4350.2217	7549.333	7452.4731	7369.4502	7286.4277	7217.2422	7120.3823	6982.0112	6788.292	6428.5273	1387.7146	1195.873	1086.2494	1013.1669	949.21967	894.40784	830.46063	711.70166	565.53668	3510.9958	2575.6772	2095.3787
77	3	2	0	1	1	1	0	0	0	0	5918.1729	5383.5137	4789.4478	4165.6787	3571.613	3036.9536	2502.2944	1997.3385	1343.8662	7145.4551	6914.9727	6713.3003	6482.8179	6223.5249	5906.6113	5474.4561	4869.4395	3976.3191	7159.6265	7085.9067	7033.25	6980.5933	6959.5308	6927.9365	6885.8115	6822.623	6685.7158	2341.6208	2049.4922	1789.822	1562.6106	1351.6287	1189.3348	1075.7292	945.89417	718.6828	4130.5264	3397.759	2917.6699
78	0	2	0	0	0	NA	1	0	0	0	2833.8342	2291.8108	1618.9543	1394.6689	1095.6216	890.02655	684.43152	460.146	348.00327	5950.2842	5409.5107	5139.1245	4672.0928	4278.8032	3762.6106	3541.3853	3074.3538	2238.6133	6543.7056	6426.5864	6289.9473	6211.8677	6075.2285	5606.7515	5372.5132	4708.8369	4103.7207	1749.2227	1530.4095	1289.7152	1114.6648	950.55505	797.38593	666.09814	469.16641	305.05664	3555.9504	3223.4836	2907.6401
79	NA	NA	NA	0	0	NA	0	0	0	0	2674.1868	1924.9261	1175.6655	633.64728	537.99695	346.69641	282.92957	251.04613	219.16269	199.62228	184.11383	169.3103	159.44128	148.1624	138.29338	127.0145	118.55535	111.50605	100.70563	95.69886	90.970238	86.797928	82.90377	78.453308	74.559151	70.108681	64.267448	2551.2283	1787.7502	1087.8953	578.90985	403.94614	276.6998	228.98241	197.17081	181.26501	160.36073	149.51038	141.37262
80	3	2	0	1	1	1	0	0	0	0	1515.42	1332.9493	1126.1492	992.33734	712.54895	481.41934	432.7605	286.78394	250.28978	5547.4365	5341.3921	5043.7725	4769.0464	4402.7451	3876.1873	3509.886	2868.8591	2296.5134	6424.4868	6411.1353	6357.7295	6317.6748	6264.2686	6157.4565	6063.9956	5890.4258	5396.4194	1361.1454	1229.2743	1090.077	958.20593	775.05164	606.54968	503.98328	379.43835	269.54578	3309.7837	3022.7607	2765.9509
81	1	2	0	1	0	NA	0	0	0	0	3677.49	2860.5864	2409.1396	2000.6876	1570.7384	1291.2714	990.30676	775.33215	538.85999	5499.0176	5461.7837	5424.5498	5368.6987	5163.9121	4996.3594	4549.5522	3488.385	2948.4929	6427.9663	6266.3799	6044.1982	5882.6118	5741.2236	5620.0337	5519.042	5135.2744	4549.5229	2273.5405	2008.8884	1810.3993	1595.3694	1396.8802	1198.3911	983.36121	751.79053	520.21985	3573.5396	3240.9443	3059.5288
82	2	2	0	1	0	NA	0	0	0	0	2854.5659	2519.313	2150.5349	1899.0953	1614.1304	1412.9788	993.91266	574.84668	356.93231	5698.7783	5523.6519	5326.6353	5085.8364	4845.0381	4341.5498	3947.5159	3553.4819	3006.2124	7170.6597	7097.9741	6967.1401	6734.5469	6472.8789	6429.2676	6342.0449	6094.9146	5629.7271	1501.1643	1376.2345	1280.1348	1164.8149	1011.0551	770.80554	636.26575	434.45605	309.52625	3121.5654	2851.8652	2600.145
83	4	0	0	0	0	NA	0	0	0	1	2400.9033	2095.2754	1735.7129	1412.1068	1178.3912	926.69751	728.93823	513.20074	351.39767	5788.7031	5402.062	5039.5859	4532.1191	4024.6523	3758.8364	3323.865	2913.0586	2453.9221	6221.9663	6129.6973	6060.4961	5922.0928	5691.4209	5391.5479	4930.2041	4307.3901	3407.77	1081.6765	949.12677	882.85193	778.70569	693.49518	579.8811	466.26706	371.58868	276.91031	2326.6809	1817.8444	1637.2896
84	1	0	0	0	1	1	0	1	0	0	314.91357	244.91054	212.60144	182.98476	166.83022	150.67566	137.21353	123.75141	112.98171	4662.2031	4084.3752	3480.2827	2928.72	2350.8923	1773.0646	1300.2965	801.26343	486.08469	5586.5083	5563.3652	5540.2222	5493.936	5401.3643	5297.2207	5123.6479	4961.6465	4649.2158	215.34207	187.94652	170.94238	154.88293	145.43619	135.98944	127.48738	118.98531	109.53857	1780.6533	1116.0646	887.61212
85	NA	NA	0	1	1	0	1	1	0	0	5879.0703	5769.458	5637.9233	5309.0864	4848.7148	4563.7227	4103.3511	3292.2202	2678.3914	6153.9917	5890.0547	5746.0889	5626.1172	5338.1855	4762.3223	4138.4707	3634.5903	3082.7214	6728.3462	6565.6172	6402.8887	6123.9248	6030.937	5798.4673	5542.751	5170.7993	4333.9082	3285.6318	2989.7585	2797.4409	2516.3611	2383.2183	2176.1069	1968.9956	1791.4716	1599.1539	3112.644	2688.7632	2354.1204
86	1	1	0	1	0	NA	0	0	0	0	5602.1138	4606.1787	3961.7498	3375.9053	2760.7688	2233.5088	1911.2946	1501.2035	1091.1124	6483.4917	6364.2148	6030.2393	5767.8296	5362.2876	4837.4688	4241.084	3430	2738.1934	6404.5962	6323.356	6303.0459	6201.4951	6059.3242	5876.5332	5470.3311	5084.439	4515.7559	2799.8586	2382.3169	2146.3149	1910.313	1819.543	1638.0029	1510.925	1347.5391	1057.0751	3659.7498	3167.9331	2945.8223
87	1	1	0	0	1	1	0	0	0	0	5690.8125	5443.5444	5326.4175	5144.2197	5001.0649	4922.98	4740.7827	4493.5146	4220.2183	6143.4043	6110.4185	6036.1992	5912.501	5863.0215	5731.0767	5590.8853	5351.7354	5195.0508	6169.7158	6154.665	6132.0889	6117.0381	6090.6992	6056.8354	6015.4458	5947.7173	5808.4976	5886.3887	5374.5225	5145.0649	4721.4512	4456.6924	4244.8857	3997.7776	3838.9224	3644.7661	5960.501	5651.835	5357.8672
88	1	0	0	0	0	NA	0	0	0	1	21.886097	20.974516	20.895248	20.062935	19.864765	19.230621	18.319038	17.724529	16.535509	38.496113	35.390522	32.673134	30.052794	28.305901	27.044254	25.588511	24.326864	23.744566	97.287155	82.719002	72.77002	64.952965	62.110397	56.069942	51.450771	47.542244	44.344357	25.777185	23.706888	22.878771	22.154167	21.533077	20.70496	20.08387	18.531149	17.288971	42.205944	39.393356	36.580769
89	2	2	0	1	1	1	1	0	0	0	3504.2278	2578.6782	2182.0142	1653.1287	1313.1309	1029.7994	803.13422	595.35779	482.02518	6837.959	6565.6699	6263.127	5930.3296	5567.2778	5173.9717	4780.6655	4205.8335	3358.7126	6973.0874	6929.7734	6900.897	6872.021	6843.145	6799.8311	6713.2026	6554.3843	6222.3096	979.03717	809.54016	714.62183	640.04315	585.80414	524.78522	477.32602	429.86688	375.62784	3270.9524	2511.1794	2119.0388
90	NA	NA	NA	1	1	1	0	0	0	1	6158.3501	5941.1631	5696.8276	5153.8599	4665.1885	3742.1431	2737.6526	2058.9426	1543.1232	7252.4707	7102.6807	6952.8911	6738.9053	6589.1157	6396.5283	6225.3403	6075.5503	5733.1733	7428.6025	7413.9824	7403.0171	7395.7065	7381.0864	7366.4663	7348.1909	7282.3994	7176.4019	2484.0027	2098.814	1814.9907	1632.533	1450.0752	1389.256	1287.8905	1206.7982	1145.979	5965.5083	5581.416	5115.0186
91	4	2	0	1	1	0	1	0	0	0	5105.7656	4286.436	3821.4114	3245.6665	2891.3618	2470.625	1917.024	1784.1598	1584.8635	5661.6074	5514.1758	5342.1719	5194.7402	4899.8774	4457.5825	3695.8525	3155.2698	2221.5364	7240.1011	7186.6875	7165.3223	7133.2739	7079.8604	6962.3506	6802.1099	6535.042	6353.436	2663.0237	2417.9426	2273.1221	2139.4417	2050.3213	1983.481	1927.7808	1805.2402	1682.6997	3631.0994	3179.01	2834.5608
92	2	2	0	1	1	0	0	0	0	0	5987.9126	5383.7505	4858.3926	4516.9097	3229.7815	2520.5479	2441.7441	1548.6349	1259.6877	6332.8511	6281.6089	6204.7461	6102.2617	5999.7773	5717.9458	5128.6616	4693.104	3514.5356	7246.0874	7091.6914	7023.0708	6697.1235	6577.0376	6422.6411	6285.4004	6096.6938	5547.73	2076.3562	1773.568	1487.6013	1252.0994	1151.1699	999.77588	865.20331	781.09546	730.63074	3320.4456	2659.4385	1951.2166
93	1	2	0	0	0	NA	0	1	0	0	5119.5601	4371.5151	3897.7537	3399.0571	2750.7517	2376.7292	2127.3811	1753.3588	1578.8149	5926.7896	5640.9028	5381.0054	4965.1699	4471.3657	3899.592	3301.8286	2860.0037	2184.2712	7015.897	6732.9883	6638.6855	6582.104	6544.3828	6487.8013	6374.6377	6091.729	5639.0757	2805.5896	2302.2156	1828.4515	1665.5952	1458.3235	1295.4672	1206.6365	1103.0006	1014.1698	3482.2681	2895.1262	2438.4602
94	1	2	0	0	1	1	0	0	0	0	4144.5161	3665.0947	3065.8179	2370.657	1843.2935	1148.1324	836.50848	596.79779	429.00034	6127.4888	5938.5317	5773.1948	5560.6182	5371.6611	5159.085	4733.9321	4119.8223	3387.6143	6435.1963	6379.0068	6334.0557	6266.6284	6199.2012	6176.7251	6075.5845	5862.0645	5603.5938	1260.6034	1003.3026	835.4978	712.44092	611.758	522.26208	455.14014	388.01822	320.89627	3380.897	2976.4927	2639.489
95	4	0	0	0	0	NA	1	0	0	0	645.29028	556.24377	439.37024	408.7605	347.54105	316.9313	275.19073	247.36371	205.62317	4473.708	4047.2341	3553.4226	3104.5027	2722.9211	2431.1233	1780.1896	1488.3918	1084.364	5863.2065	5823.6592	5793.999	5695.1313	5596.2642	5527.0566	5408.4155	5171.1333	4785.5498	408.70282	357.94965	295.3541	264.90219	232.75851	217.53256	198.92307	187.08066	173.54648	3188.7749	2722.6985	2310.4001
96	3	1	0	1	1	1	1	0	0	0	5429.6025	5123.4785	4776.5381	4347.9644	3858.1658	3286.7344	2715.3027	2368.3623	2062.2383	5944.2822	5668.3501	5530.3843	5369.4238	5139.4805	4886.543	4541.6279	4081.7412	3437.8997	7607.8984	7495.6548	7364.7036	7233.7529	7102.8018	6971.8506	6822.1924	6616.4121	6373.2173	2193.231	2036.577	1924.6814	1812.7858	1723.2693	1656.1318	1577.8049	1488.2883	1387.5823	3200.1428	2615.0842	2246.7141
97	2	2	0	1	1	0	1	1	0	0	6114.9585	5994.5176	5825.9004	5464.5771	4597.4014	4284.2549	3513.4321	2718.5212	2188.5806	6688.6865	6288.6147	6202.8853	6117.1553	6031.4258	5831.3901	5574.2012	4859.7876	3602.4192	7270.7119	7229.1606	7166.8335	7125.2827	7042.1802	6896.751	6720.1582	6408.5244	6024.1758	1883.1208	1682.4705	1557.064	1456.7389	1431.6576	1406.5763	1368.9543	1306.2511	1243.5479	2849.063	2359.1543	1991.7229
98	3	2	0	1	0	NA	0	0	0	0	6842.5142	6600.0791	6276.8325	5818.8999	5118.5322	3987.1692	3017.4294	2613.3711	2370.9363	7111.0581	6888.6211	6666.1836	6471.5508	6276.9185	6082.2856	5776.4341	5303.7549	4274.9824	7304.1426	7247.7593	7205.4717	7149.0884	7022.2261	6867.1719	6655.7349	6402.0098	6035.5186	4598.374	4181.0005	3727.334	3110.3474	2656.6809	2420.7742	2275.6008	2075.9875	1821.9343	3354.6338	2771.886	2518.5176
99	NA	NA	NA	0	0	NA	0	1	0	1	6170.8257	6138.5894	6009.6431	5638.9229	5542.2134	5332.6758	5155.375	4929.7192	4172.1606	5943.4937	5580.397	5171.9131	4831.5098	4513.8003	4128.0098	3764.9128	3356.429	2947.9451	2428.3396	2022.6566	1721.6661	1420.6757	1080.4254	805.60803	543.8772	373.75211	295.23285	5701.9951	5427.0972	5129.291	4877.3013	4510.771	4121.3325	3640.261	3205.0061	2632.302	4709.2397	4075.7202	3494.9937
100	4	0	0	1	0	NA	1	1	0	0	6521.6318	6364.3926	6138.3613	6020.4321	5823.8833	5597.8521	5499.5771	5401.3027	5155.6167	6549.7446	6518.5195	6508.1108	6476.8857	6445.6602	6351.9844	6185.4487	6070.9561	5675.4346	6782.2783	6747.3755	6562.8882	6542.9434	6527.9849	6515.5195	6505.5474	6493.082	6468.1514	5766.3755	5562.4238	5249.6978	4801.0034	4665.0356	4501.874	4365.9063	4161.9541	4025.9863	6341.4609	6215.5503	6033.6787
101	1	2	0	0	0	NA	0	0	0	0	2680.4951	2394.1929	2232.3699	2008.307	1784.2444	1522.8379	1311.2231	1136.9521	1049.8167	5318.1309	5067.6587	4767.0923	4499.9224	4199.356	3848.6956	3481.3367	3280.9592	2930.2986	5542.9551	5491.2144	5449.8218	5346.3408	5242.8594	5139.3779	4849.6304	4611.6235	4177.002	1952.1006	1788.4957	1667.9448	1564.6155	1418.2323	1280.4598	1151.2981	1039.358	936.02869	3449.9309	3161.2966	2923.5977
102	4	0	0	1	1	0	0	0	0	1	3503.7251	2506.9736	1980.3879	1717.0951	1340.9625	1284.5426	1152.8961	1077.6697	1021.2498	5715.7451	5595.4224	5475.0991	5258.5181	4969.7432	4608.7749	3814.644	2852.0613	1817.2848	6940.73	6884.0532	6827.3765	6756.5308	6572.3315	6373.9629	6189.7637	5977.2261	5835.5342	2013.1145	1847.6808	1516.8132	1445.9131	1367.1351	1091.4121	1059.901	996.8786	910.22284	2866.5129	2530.342	2328.6394
103	1	2	0	0	1	0	0	0	0	0	3030.8816	2156.5535	1396.2682	1244.2111	1130.1682	940.09692	807.04694	559.95422	388.89001	5761.5361	5594.645	5499.2788	5308.5459	5070.1294	4378.7227	3854.207	3043.5923	2256.8188	6181.6909	6163.2749	6144.8589	6108.0264	6052.7783	6015.9463	5942.2817	5684.4565	4874.1494	2043.6561	1863.584	1644.9249	1387.679	1091.8461	937.49854	757.42639	603.0788	410.14432	3040.2559	2680.1682	2392.0981
104	3	1	0	1	0	NA	0	1	0	1	408.30011	401.12933	351.95825	346.83627	341.71426	308.93356	302.78717	283.32361	262.83566	1505.4044	1187.5725	962.01447	818.47754	736.45642	654.4353	572.41418	531.40363	469.88779	6921.6177	6607.5635	6230.6987	5759.6177	5288.5366	4786.0503	4063.7263	3278.5913	2462.0508	385.77249	353.86133	336.36163	322.97952	302.39166	289.00955	273.56866	256.06897	236.5105	1077.7069	848.26538	737.021
105	4	2	0	1	1	1	0	0	0	0	2124.4233	1570.4708	1322.6499	1147.7174	1001.9404	870.74115	695.80872	506.29861	360.52161	5776.6465	5554.6582	5304.9219	4971.9395	4611.209	4167.2324	3667.7593	3057.292	2252.5852	7249.0337	7082.2085	6854.7197	6672.729	6490.7378	6323.9126	6172.2534	5944.7646	5565.6167	1535.3737	1205.8527	1013.6321	876.3316	752.76123	642.9209	546.81061	436.97028	354.59003	3423.9365	2900.1694	2424.0173
106	3	0	0	1	0	NA	1	1	0	0	174.90645	174.0699	159.84874	158.59392	157.75739	145.20929	133.49774	120.53137	106.3102	360.44638	327.3342	287.8132	271.7912	261.10986	244.0197	224.79327	217.31633	198.0899	5278.5757	4676.5898	3472.6177	2975.325	1849.8729	855.28741	698.24756	541.20776	488.86115	162.9218	156.34279	148.44798	142.74619	133.97417	127.39517	119.06176	112.04416	102.83355	313.53311	287.61588	263.95227
107	3	1	0	1	1	1	0	1	0	1	678.56592	557.27209	516.84082	472.73395	443.32938	402.8981	373.49353	344.08896	311.00882	6749.1514	6148.9951	5548.8389	4848.6567	4081.7903	3248.24	2414.6897	1547.7974	1047.6671	7496.5327	7476.0938	7452.248	7431.8086	7414.7764	7390.9307	7356.8652	7309.1738	7224.0107	481.35837	450.24695	421.35779	392.46866	368.02399	348.02377	323.57913	301.35669	274.68979	4317.4683	3184.8586	2375.8518
108	1	1	0	0	1	0	0	1	0	0	2387.5073	2144.1277	1964.7953	1798.2723	1618.9399	1362.7509	1093.7523	927.22943	658.23083	5571.376	5272.1724	4913.1279	4494.2432	4055.4114	3656.4734	3257.5354	2858.5974	2419.7656	5958.4688	5911.6899	5810.3359	5786.9468	5755.7607	5724.5752	5701.1855	5623.2212	5436.1064	1630.4435	1299.0815	1066.2327	922.94098	833.38373	752.78217	681.13635	609.49054	537.84473	3907.8379	3198.5615	2733.863
109	NA	NA	NA	0	1	1	1	0	0	0	5387.437	5164.4424	4919.1484	4651.5547	4383.9614	4027.1699	3692.6782	3246.689	1975.6199	5701.0161	5675.1729	5649.3296	5623.4863	5589.0283	5554.5708	5502.8838	5416.7393	5244.4507	6403.1021	6240.3213	6130.0503	6040.7837	5967.2695	5893.7559	5825.4932	5757.23	5699.4692	2810.6897	2472.6716	2276.9771	2134.6536	1992.3303	1885.5878	1761.0548	1636.522	1423.0369	5567.332	5463.853	5334.5034
110	4	2	0	1	1	1	0	1	0	0	5068.3706	4849.8535	4631.3359	3053.1548	2616.1199	2519.001	2324.7634	1863.4489	1232.1763	6775.5962	6603.04	6516.7617	6372.9653	6200.4092	5884.0562	5107.5542	4762.4419	3813.3838	7339.7666	7314.6323	7264.3647	7239.231	7226.6641	7188.9629	7151.2622	7113.5615	6862.2227	4510.8647	4023.9165	3913.2466	3426.2983	3094.2881	2718.01	2452.4019	1832.6495	1611.3094	5804.9697	5108.2827	4653.9219
111	4	1	0	0	0	NA	0	1	0	1	1772.5897	798.01471	638.90039	519.5647	459.89682	420.11823	380.33966	320.67181	280.89325	5787.3193	5545.1001	5121.2173	4818.4438	4273.4512	3365.1309	2729.3064	1851.2631	1033.7745	7202.3447	7123.5742	7005.4185	6887.2627	6749.4146	6631.2588	6375.2549	5942.0171	4780.1528	992.12488	825.81549	641.99988	536.9624	466.93738	396.91238	361.8999	326.88739	274.36865	1415.7522	1116.1997	936.4682
112	3	2	0	1	1	0	1	0	0	0	3928.3376	3295.9524	2619.9543	1943.9563	1507.8285	1137.12	1028.088	853.6369	744.60498	5600.4351	5478.2505	5258.3184	4989.5122	4671.8325	4231.9678	3669.9189	2887.9377	1983.7719	5655.5791	5603.124	5550.6689	5428.2739	5323.3633	5200.9683	4903.7222	4588.9912	4204.3203	2107.2783	1796.4342	1547.7588	1410.9874	1112.577	1062.8419	913.63678	814.16663	714.69653	3026.2417	2633.9849	2365.5986
113	1	1	0	1	0	NA	0	0	0	0	2384.5664	1476.8516	1131.9199	877.7597	678.06244	532.828	460.21085	387.59363	314.97644	6133.5562	5562.1982	5111.1265	4569.8398	4028.5535	3186.5525	2645.2661	1923.5509	1322.1216	6856.8047	6832.9194	6809.0347	6761.2651	6617.9556	6474.6465	6164.1431	5781.9849	5089.3232	1204.7932	897.80365	699.16339	590.81415	491.49399	437.31937	365.08655	319.94101	265.76639	3243.4807	2574.0786	1904.6765
114	1	2	0	1	1	0	0	0	0	0	6331.6675	6060.6123	5708.2407	5193.2363	4488.4937	3539.801	2591.1086	2021.8932	1615.3107	6747.4834	6561.0493	6401.249	6241.4482	6001.7476	5735.4131	5309.2783	4749.9766	3871.0732	7400.4731	7370.0981	7324.5361	7309.3486	7278.9741	7248.5991	7195.4434	7096.7256	6891.6963	2106.8718	1750.985	1567.3015	1441.019	1349.1772	1268.8158	1199.9344	1131.0531	1073.652	4321.4194	3384.6357	2778.4817
115	2	2	0	1	1	1	1	0	1	0	4552.3667	3511.4534	2825.9741	2368.9878	2064.3303	1886.6135	1734.2847	1581.9559	1378.851	6025.5723	5868.2559	5632.2813	5317.6484	4924.3569	4426.1885	3823.1421	3141.4375	2381.0747	7179.4526	6992.3335	6735.0439	6360.8052	6126.9058	5986.5664	5869.6167	5659.1069	5074.3589	1836.2554	1673.142	1550.8069	1452.939	1355.0709	1257.2029	1159.3348	1045.1555	922.82043	2714.6333	2048.072	1776.5099
116	4	1	1	0	1	1	1	0	0	0	416.10925	379.21191	361.56537	340.71036	315.04263	295.79187	271.72839	242.8522	220.39296	4715.3022	4098.3877	3604.8562	3037.2949	2346.3508	1828.1426	1309.9344	939.78577	668.34344	5529.6719	5470.23	5410.7876	5351.3452	5283.4111	5198.4937	5071.1172	4935.249	4672.0044	343.05438	321.17639	303.10327	284.07892	269.81067	260.29849	242.22536	230.81075	215.59128	2382.5928	1979.3083	1643.238
117	2	0	0	1	1	1	0	1	0	1	496.59253	462.15262	441.48865	407.04874	382.9408	346.77887	326.11493	281.34302	236.57112	5576.6777	5184.2183	4687.103	3562.052	2777.1328	1599.7539	919.49066	736.34283	605.52295	5562.5332	5491.75	5382.3579	5266.5308	5157.1382	5041.311	4931.9189	4796.7876	4648.7861	414.17493	378.50052	344.80804	311.11554	275.44113	247.69438	221.92953	192.20085	152.56262	3756.8147	2828.822	2233.9551
118	1	2	0	1	0	NA	0	0	0	0	4858.3545	4348.1099	3815.6809	3349.8057	2906.1147	2506.7932	2174.0251	1863.4415	1597.2271	5359.2358	4940.957	4476.2026	4081.1619	3616.4077	3198.1289	2686.8994	2315.0959	1827.1042	6380.46	6286.9951	6170.1646	6053.3335	5796.3062	5282.2505	4838.2935	4160.6748	3319.4932	1364.9248	1248.3268	1181.6993	1120.6243	1076.2059	1026.2354	976.26483	937.3988	887.42822	2038.3135	1582.4094	1387.022
119	4	0	0	0	0	NA	0	1	0	0	2313.3337	2071.5422	1853.9296	1648.4067	1406.615	1140.6442	874.6734	644.97131	463.62753	709.81018	439.17877	373.85394	336.52545	308.52911	280.53275	261.86853	243.20428	224.54004	191.13673	181.30228	174.61485	168.32082	162.81352	158.09299	152.97908	146.68503	138.81747	1945.1702	1662.7981	1391.2865	1163.2168	902.56573	717.93787	565.89136	446.4263	359.54257	361.95294	300.90613	265.2955
120	2	1	0	1	1	1	1	0	0	0	5182.6851	4829.959	4269.7461	3647.2878	2983.332	2485.3652	2153.3875	1904.4042	1655.4208	6924.3638	6774.8286	6650.2163	6550.5264	6351.146	6176.6885	5877.6187	5553.626	5005.3311	7449.6455	7406.7793	7354.3872	7301.9946	7268.6543	7216.2622	7178.1587	7125.7666	7030.5078	2547.9976	2204.7476	1918.7059	1689.8726	1532.5497	1432.4351	1332.3204	1246.5079	1146.3934	4819.165	3565.3689	2825.9507
121	1	2	0	1	1	1	0	1	0	0	6215.0747	5026.5898	3278.8174	3022.4775	2882.6558	2742.834	2603.0122	2439.8867	2253.4578	7109.1968	6845.9214	6687.9561	6608.9736	6477.3359	6319.3706	6003.4404	5424.2349	4423.7886	7509.7158	7401.519	7309.9683	7226.7402	7143.5117	7026.9927	6893.8276	6752.3398	6585.8833	2897.8181	2787.0859	2692.1726	2597.2593	2510.2554	2375.7947	2185.968	1996.1414	1861.6807	3714.072	3001.0366	2715.8225
122	3	3	0	1	0	NA	0	0	0	1	3999.1033	3707.4617	3579.8684	3324.6819	3178.8611	2996.585	2923.6746	2723.1709	2577.3501	7216.7148	6891.2808	6240.4126	5855.8086	5116.1851	4317.3921	3636.939	2660.6362	2216.8623	7360.416	7306.6689	7252.9219	7118.5542	6984.187	6715.4517	6392.9697	5801.7524	4807.4321	3712.7539	3517.0469	3230.0098	3060.397	2916.8784	2734.2185	2564.6055	2408.0398	2303.6626	3353.3977	2991.7639	2763.3635
123	2	2	0	0	0	NA	0	0	0	0	2664.4233	2244.6121	1908.7628	1589.7062	1354.6118	1153.1023	951.5929	783.66833	531.78149	5913.6782	5581.998	5148.2622	4689.0127	4204.249	4000.1382	3413.3191	2800.9863	2112.1118	6217.4019	6201.9106	6170.9277	6139.9453	6093.4712	6046.9971	5892.083	5675.2041	5163.9888	2476.1624	2041.5543	1741.8246	1606.9463	1487.0544	1277.2437	1067.4329	842.63562	542.90594	4271.7441	3566.5815	3081.7822
124	2	2	0	1	1	0	0	1	0	0	5636.6406	5356.5034	5229.168	5101.833	4949.0308	4719.8276	4388.7563	3675.6799	2504.1968	3989.8047	3607.5474	3359.0801	3206.177	2881.2583	2479.8882	2174.0823	1906.5021	1619.8091	6736.7847	6560.3809	6383.9771	6227.1738	6089.9707	5991.9683	5835.165	5501.9575	5070.748	2320.7761	1919.1602	1696.0402	1517.5442	1361.3602	1227.4883	1115.9283	1026.6803	915.12036	2815.1838	2403.9766	2218.9333
125	0	2	0	0	0	NA	0	0	0	0	5758.5879	5352.7573	4622.2617	3350.6592	2971.8838	1889.6687	1592.0596	1321.5057	1050.9519	6172.7173	6121.5601	6070.4028	5865.7749	5558.8325	4868.2124	3947.3855	2898.666	1952.2605	6209.4678	6188.4146	6167.3608	6146.3076	6125.2539	6104.2007	6083.147	5872.6123	4946.2598	2339.1028	1875.575	1562.3804	1437.1025	1249.1858	1111.3802	1036.2135	935.99127	848.29681	3197.4746	2627.2192	2304.9011
126	3	2	0	1	1	1	1	0	0	0	4317.7671	3045.2527	2621.0813	1857.5728	1560.6527	1221.3157	1009.2299	903.18707	754.72705	5827.2007	5702.2676	5552.3477	5477.3877	5302.4814	5102.5884	4802.749	4278.0298	3428.4841	5733.5459	5641.2729	5572.0679	5502.8633	5445.1929	5375.9878	5283.7148	5145.3057	4949.2256	1139.5908	1047.162	997.39258	961.84302	933.40338	904.96375	876.52411	840.97455	784.09528	2433.9216	1778.4182	1502.4169
127	2	0	0	0	0	NA	1	0	0	1	26.082624	24.861803	23.966532	23.396816	22.582933	21.687664	20.873783	19.246019	15.74633	42.966194	39.822151	38.087505	35.485538	32.883575	31.257345	28.655378	27.571224	26.161827	84.067696	75.432732	69.995903	65.838326	60.081684	57.842991	53.045788	48.888214	47.289146	20.658144	19.433519	18.744669	17.520042	16.525036	15.453489	14.841176	13.616551	12.085771	40.969093	38.316879	35.664661
128	2	2	0	0	1	0	0	0	1	0	397.6713	386.35846	331.20837	305.75452	285.95703	261.91727	235.04929	219.49413	184.14153	5168.0977	4874.8496	4215.0415	3286.4229	2431.1162	1673.5588	1135.9375	842.68945	696.06549	5207.9473	5182.4766	5164.2832	5149.7285	5138.8125	5124.2578	5106.064	5087.8706	5036.9292	389.30597	330.37048	293.26297	258.33823	229.9619	203.76836	181.9404	160.11246	136.1017	2570.8323	1932.9496	1602.1957
129	2	2	0	1	1	1	0	0	0	0	6011.4932	5783.7729	5429.5415	4999.4033	4493.3584	3810.1975	3000.5256	2190.8535	1532.9951	6163.2178	5989.3257	5815.4336	5567.0166	5268.9155	4846.6064	4399.4556	3852.9375	3058.0024	6284.0415	6142.6309	6071.9258	6018.8965	5930.5146	5824.4565	5683.0459	5435.5771	4940.6396	1352.778	1193.2556	1140.0815	1097.5422	1055.0029	1012.4637	959.28955	884.84583	799.76727	1780.4292	1517.8636	1378.8584
130	1	2	0	1	1	1	0	0	0	0	6419.752	5965.332	5617.835	5457.4512	4708.9956	3506.1199	1902.2858	1715.1718	1394.4049	6744.9849	6568.1831	6302.981	5919.9111	5418.9731	4652.8335	3709.8918	2825.884	1882.9425	7213.7075	7065.5947	6917.4819	6798.9917	6680.5015	6473.1436	6117.6729	5406.7319	4251.4526	1681.5232	1558.5681	1474.9587	1401.1858	1352.0038	1307.7399	1263.4761	1214.2941	1150.3575	1691.865	1482.7463	1320.0986
131	1	2	0	1	0	NA	1	0	0	0	5189.2881	4388.3589	3615.0479	2896.9734	2234.1353	1737.0066	1460.8241	1295.1146	1157.0233	6194.9961	6126.5776	6012.5464	5830.0967	5556.4224	5214.3291	4826.6235	4324.8867	3686.3127	6742.3623	6647.5762	6552.7905	6414.9199	6242.582	6199.4976	6165.0303	6121.9458	6009.9258	1601.8331	1286.5173	1156.6814	1082.4895	1026.8456	971.2016	915.55762	850.63965	757.89978	3657.4583	3025.2407	2475.4863
132	2	1	0	0	1	0	0	0	0	0	5373.8901	4728.6328	3915.0469	3185.625	2568.4219	2119.5471	1670.6721	1277.9065	997.35968	5838.2876	5742.8242	5647.3613	5528.0322	5384.8374	5217.7769	4931.3867	4501.8022	3881.2913	5798.5195	5725.6968	5679.355	5639.6338	5586.6719	5540.3301	5480.748	5421.1655	5321.8623	1326.1437	1033.4821	887.15112	797.10138	718.30786	662.02679	605.74567	560.72076	504.4397	3174.8323	2531.9014	2103.2808
133	3	2	0	1	1	0	0	0	0	0	5806.1367	5597.3574	5405.9766	5145.0024	4849.2314	4501.2661	4118.5039	3753.1404	3335.5818	6112.6216	5944.7739	5797.9072	5588.0977	5315.3452	5042.5928	4706.8975	4329.2402	3867.6592	7047.1841	6894.7251	6742.2666	6589.8076	6406.8574	6178.1689	5964.7271	5644.5635	5126.2036	3083.052	2863.5447	2702.5725	2526.9668	2409.896	2307.4592	2190.3887	2058.6843	1912.3462	3844.9058	3465.0476	3190.7056
134	2	2	0	1	0	NA	0	0	0	0	3017.6843	2479.0132	2058.1765	1805.6746	1603.673	1418.5048	1283.837	1166.0028	930.33423	5764.3618	5620	5355.3374	5042.5542	4681.6509	4224.5059	3695.1807	2997.4336	2179.3853	7210.8066	7006.0625	6760.3691	6446.4282	6241.6836	6105.1875	6009.6401	5914.0928	5722.998	1244.283	1149.7813	1080.48	1017.4789	948.17761	885.17651	809.57513	715.07343	601.67139	3721.0461	2828.8164	2184.4282
135	2	2	0	1	0	NA	0	0	0	0	1811.1215	1424.9521	1239.0188	1153.2035	1067.3881	952.96753	795.63934	652.61371	452.37781	4176.2065	4092.6426	3925.5146	3724.9614	3457.5569	3123.3013	2688.769	2153.96	1569.0127	4224.5054	4177.1831	4141.6914	4112.1147	4070.708	4011.5552	3940.5718	3845.9272	3721.7063	1151.2626	1117.2601	1054.9222	964.24902	850.90741	720.56458	578.88763	442.87772	318.20197	2788.0688	2023.6985	1594.9054
136	4	2	0	1	1	1	0	0	0	1	6028.3354	5837.8076	5532.9629	5113.8022	4732.7466	4294.5327	3875.3716	3494.3162	3075.155	6114.6147	6038.1782	5904.4146	5713.3232	5464.9048	5082.7222	4585.8853	3974.3936	3305.5745	7363.5708	7210.4419	6991.687	6794.8071	6576.0518	6357.2969	6182.2925	5963.5376	5547.9028	3056.7993	2712.4351	2540.2529	2419.7256	2316.4163	2230.3252	2144.2341	2075.3613	1989.2701	2780.8206	2514.8066	2390.667
137	3	2	0	1	1	1	0	1	0	1	348.89896	335.64536	306.07962	295.88452	278.55289	267.33829	250.00664	229.61646	205.14825	5900.4058	4997.2524	3762.9431	2618.949	1655.5856	963.16815	632.01196	481.48642	421.27621	6975.4595	6657.3145	6310.2471	6209.019	6136.7134	6093.3301	5948.7188	5717.3403	5399.1953	308.42325	291.10855	273.79382	261.67349	249.55319	234.83568	220.11816	204.53491	185.48871	2285.0576	1819.2865	1475.0209
138	3	1	0	1	0	NA	0	1	0	0	4741.8989	4082.7732	3376.5671	2717.4414	2058.3157	1540.431	1281.4888	1163.7877	1093.1671	5797.3779	5646.8491	5395.9673	5044.7334	4618.2354	4091.3843	3514.3572	2836.9773	2084.3333	6899.6577	6747.7461	6595.8345	6422.2212	6205.2046	5944.7842	5706.0659	5272.0327	4555.8774	1253.7452	1179.3761	1132.0503	1091.4852	1050.9203	1017.1161	976.55121	935.98621	868.37793	2312.3823	2006.8187	1755.1782
139	3	2	0	1	1	1	0	0	0	1	6367.2754	5926.1157	5319.5215	4575.0645	3858.1799	3086.1506	2341.6938	1983.2516	1762.6718	6672.8853	6531.1157	6389.3462	6247.5771	6058.5513	5893.1538	5656.8716	5278.8198	4569.9731	7191.7065	7131.2471	7082.8799	7010.3291	6901.5029	6780.5845	6635.4824	6466.1973	6200.1772	1970.5615	1802.7716	1695.9963	1604.4746	1528.2064	1436.6847	1345.163	1238.3876	1101.105	3601.5164	2961.7664	2705.8665
140	0	2	0	1	1	1	0	0	0	0	2480.8999	1884.2787	1585.9681	1357.8483	1235.0144	1147.276	1094.6329	1024.4423	884.06073	5994.4971	5714.5068	5546.5132	5294.522	4958.5342	4538.5493	3866.5735	2998.6047	1934.6429	5828.3789	5622.1094	5457.0933	5312.7046	5147.6885	4920.792	4632.0142	4198.8472	3497.5298	1187.6929	1121.5637	1084.3661	1051.3016	1018.2371	985.17255	939.7088	865.3136	786.78528	2424.166	1870.6843	1572.6558
141	2	2	0	1	0	NA	0	0	0	0	6418.7251	6174.1411	5807.2646	5367.0132	4804.4697	4266.3843	3630.4656	2970.0881	2383.0862	6697.5522	6633.6284	6585.686	6505.7817	6409.896	6250.0874	6058.3164	5754.6797	5339.1768	7349.5703	7305.6748	7250.8062	7206.9106	7130.0942	7042.3037	6954.5132	6844.7754	6658.2207	2551.0073	2291.592	2124.8252	2013.6473	1883.9398	1772.7618	1661.584	1550.406	1420.6985	4811.5103	4184.4111	3789.5713
142	3	2	0	1	0	NA	0	0	0	0	5539.8076	5468.3403	5373.0508	5206.2939	4872.7803	4420.1548	3443.4363	2228.4941	1680.579	7183.8145	7028.0967	6801.5986	6575.1006	6207.041	5895.606	5683.2642	5541.7026	5329.3604	7228.2529	7205.5581	7186.646	7175.2983	7160.1689	7141.2563	7118.562	7099.6494	7039.1304	2738.3179	2332.0989	2106.4216	1948.4478	1813.0414	1677.6351	1542.2289	1316.5516	1000.6036	5067.2559	4331.6475	3727.3972
143	2	2	0	1	1	1	0	0	0	0	5613.1968	4781.8662	3497.0825	2161.915	1960.3805	1809.2295	1658.0784	1506.9274	1355.7764	6106.8057	6058.0366	6009.2676	5936.1143	5765.4229	5472.8086	5009.5034	4277.9683	3180.666	6171.5229	6136.9126	6102.3022	6067.6919	6033.0815	5998.4712	5911.9453	5704.2827	5271.6528	2073.6765	1852.1603	1674.9474	1519.8861	1364.8248	1220.8394	1099.0054	988.24738	866.41345	2203.9927	1829.7063	1589.0936
144	NA	NA	NA	1	1	1	0	1	0	0	6911.6973	6618.0161	6511.2227	6484.5244	6270.9385	5096.2144	4642.3433	4161.7744	2613.2744	6977.3452	6921.144	6864.9434	6724.4404	6527.7368	6246.7314	5712.8208	4897.9053	3408.5767	6542.3955	6420.9517	6348.085	6250.9302	6153.7749	5983.7534	5910.8867	5595.1323	4915.0459	4248.5049	3779.3059	3412.1064	3187.7068	2942.9072	2575.7078	2269.7083	2024.9087	1678.1093	4483.8374	3813.6619	3384.7495
145	4	0	0	1	0	NA	0	0	0	1	222.59261	206.71001	190.82741	179.99835	164.83769	155.45251	143.90154	131.62862	117.91182	3909.8333	3203.2659	2685.1165	2166.967	1672.3698	1154.2202	659.62305	424.10052	306.33929	5957.8384	5927.855	5897.8721	5852.8975	5762.9482	5568.0586	5253.2363	4848.4653	4203.8296	197.95764	185.28995	175.54556	166.77562	154.10794	144.36356	137.5425	127.79812	116.10487	2359.6338	2009.2495	1692.2352
146	NA	NA	NA	0	1	1	0	0	0	0	6832.998	6783.7578	6737.5952	6700.665	6663.7349	6626.8047	6589.8745	6546.7891	6494.4712	6543.2876	6524.0674	6512.0552	6497.6401	6480.8228	6466.4077	6430.3701	6375.1123	6305.4395	6473.7358	6463.3018	6451.3774	6434.9814	6415.604	6382.812	6366.416	6350.02	6330.6426	6743.394	6688.8735	6634.353	6591.5156	6552.5728	6505.8408	6447.4263	6396.7998	6338.3853	6504.625	6474.4121	6444.1992
147	2	2	0	0	0	NA	1	0	0	0	5129.7656	4438.5918	3545.8259	2768.2554	2163.4783	1414.7065	953.92401	665.93494	521.94037	6189.916	6137.8213	6085.7266	6007.585	5825.2539	5460.5923	5069.8828	4496.8428	3402.8574	6185.6841	6159.5845	6140.0093	6107.3848	6094.335	6081.2847	6061.71	6035.6104	5839.8618	1034.392	682.41534	599.05249	543.47723	506.42706	487.90198	460.11435	432.32672	395.27655	3519.3169	2433.093	1876.0551
148	4	2	0	1	1	1	0	0	0	1	7203.3882	6948.1362	6852.4165	5608.0635	5352.8115	4874.2144	3151.2642	2640.7603	2130.2566	7328.6279	7297.0835	7265.5396	7107.8193	6981.6431	6887.0107	6413.8496	5404.4395	3921.8687	7414.0762	7359.1089	7331.6255	7317.8838	7290.4004	7262.917	7235.4336	7180.4668	6919.3735	3871.4314	3380.1523	2933.5352	2509.2488	2151.9548	1839.3229	1593.6833	1303.3821	1035.4117	5143.644	3410.9812	2677.9314
149	4	2	0	1	0	NA	1	1	0	1	5335.2275	4994.5688	4611.3276	4100.3389	3610.6418	3163.5269	2822.8679	2397.0442	2035.0941	6926.8828	6546.5527	6090.1567	5760.5371	5329.4966	5101.2983	4695.6133	4163.1509	3326.4248	7563.2944	7522.6206	7495.5054	7448.0527	7387.0425	7312.4741	7244.6851	7115.8857	6966.7495	3068.3323	2542.666	2140.686	1831.4706	1676.8629	1537.7159	1460.4121	1352.1866	1243.9613	4735.833	4044.9036	3381.6111
150	1	0	0	0	0	NA	1	1	0	0	11.653519	11.363679	11.200644	10.910806	10.729655	10.204322	10.005057	9.7514477	9.3891487	17.286701	16.629622	15.972542	15.195993	14.479179	13.881834	13.314357	12.985817	12.269003	26.742891	25.525928	23.943876	22.726913	21.509951	21.023167	20.110445	19.562811	18.95433	14.105505	11.996541	11.711546	11.198555	10.856561	10.514566	10.058575	9.602582	9.1465902	21.603113	19.157106	17.88093
151	2	2	0	1	1	1	1	0	0	0	5658.6406	5424.4854	4539.8989	4097.6055	3655.3123	2510.5532	2146.3115	1808.0874	1183.6733	6219.1577	6152.0439	6084.9302	5950.7031	5794.1045	5570.3921	5257.1953	4720.2856	4093.8914	7102.6978	6771.9961	6485.3882	6264.9204	6132.6401	6044.4531	5978.3125	5735.7983	5272.8159	2296.9438	1867.9341	1561.4984	1423.6024	1193.7758	1071.2014	994.59253	902.66187	826.05298	3544.4175	2578.9536	2313.4509
152	2	2	0	1	1	1	0	0	0	0	3122.9114	2427.5833	2030.2531	1891.1874	1752.1218	1573.3231	1414.391	1295.1919	897.86163	6103.833	5806.3662	5644.1113	5319.6016	4913.9644	4319.0303	3670.011	2912.8218	2182.675	7238.5488	7145.8276	6986.876	6735.2036	6563.0063	6457.0386	6231.8579	6033.1689	5755.0044	1980.5295	1864.1147	1756.655	1649.1953	1550.6906	1398.4559	1273.0863	1120.8517	941.75214	2481.9763	2106.967	1943.9194
153	3	1	0	1	1	1	0	0	0	0	1102.7891	823.57776	670.46191	526.35284	445.2915	355.22336	292.17563	247.14156	220.12111	5426.6738	4972.6509	4442.9575	3787.1467	3156.5596	2551.1958	1996.2789	1567.4796	1163.9037	6506.7813	6214.186	6011.6201	5786.5474	5628.9961	5426.4307	5111.3281	4661.1821	4030.9775	782.11829	630.54321	509.28317	428.44312	357.70807	297.07806	251.60553	216.23801	190.97549	1585.7511	1394.6089	1244.4258
154	4	2	0	1	1	0	0	1	0	1	5683.8403	5650.4043	5650.4043	5625.3267	5508.2993	5483.2222	5449.7856	5416.3491	5382.9126	6973.6675	5756.2222	5729.9468	5703.6709	5668.6362	5581.0503	5458.4302	5405.8784	5327.0513	5770.4819	5747.3604	5724.2388	5546.9731	5500.73	5462.1938	5431.3647	5423.6577	5377.4146	7053.0283	6961.9702	6943.7588	6907.3354	6360.9888	5714.4785	5659.8438	5632.5264	5468.6221	7172.5186	7142.6377	7013.1533
155	2	2	0	0	1	1	1	0	0	0	1818.9221	1527.901	1076.8182	945.8587	727.59283	523.87799	407.46954	305.61212	261.95895	6173.873	5982.6406	5600.1748	5217.7095	4644.0117	4097.6323	3551.2534	2868.2793	2076.0295	6194.0972	6175.5244	6160.6665	6149.5229	6130.9502	6127.2358	6116.0923	6104.9487	6038.0874	957.3996	674.48663	557.9931	474.78342	408.21567	358.28986	300.04306	250.11725	225.15434	4674.8574	3881.2288	3352.1431
156	3	0	0	1	1	1	1	0	0	0	398.16592	294.34982	260.49673	235.67113	213.1024	195.04742	179.24931	158.93747	136.36874	3962.8481	3313.9072	2754.4753	2351.6846	1948.8937	1523.7256	1277.5756	941.9165	673.38922	5553.1606	5372.8154	5272.6235	5152.3931	4891.8945	4691.5103	4410.9731	3950.0903	3128.5168	214.76334	196.56844	182.50874	171.75722	165.14088	157.69753	150.25417	142.81079	134.54039	1148.6119	879.05096	710.57538
157	2	2	0	1	1	1	0	0	0	0	2447.9089	2146.1477	1655.7855	1278.5837	1071.1228	807.0816	580.76062	429.87991	316.71942	6592.5352	6509.9438	6289.7007	6014.3965	5711.562	5243.5449	4747.9976	4197.3892	3399.0073	6803.1226	6785.7798	6768.4365	6745.313	6727.9702	6710.6274	6687.5034	6658.5986	6623.9131	1408.4091	1139.1146	900.89264	755.88794	662.67065	517.66595	424.44861	331.23132	248.37149	4675.0776	3895.0969	3449.3936
158	2	2	0	1	1	1	0	0	0	0	1211.0551	954.42169	800.44165	749.11499	689.23383	629.35272	578.02606	543.80829	492.4816	5149.1182	4075.5276	3283.1157	2720.7588	2260.6487	1902.785	1596.0449	1314.8665	1059.2498	7183.7075	7066.2222	6801.8799	6566.9092	6243.8247	6067.5967	5685.769	5039.5996	4187.8306	966.96112	875.65143	761.5144	688.46674	606.28802	537.80579	505.84744	464.75809	423.66876	1981.8695	1770.6769	1633.4016
159	3	0	0	1	1	1	0	0	0	0	4237.75	3349.8958	2929.3333	2438.6772	2064.8438	1761.1042	1550.8231	1410.6356	1247.0835	6990.2769	6850.5513	6710.8262	6571.1006	6347.54	5900.4189	5397.4077	4698.7808	3748.6484	7296.2681	7232.1694	7200.1201	7168.0708	7152.0464	7119.9971	7071.9229	6959.7505	6527.085	4872.749	4355.1206	3837.4919	3296.335	2990.4634	2637.5349	2355.1921	2096.3779	1837.5637	4542.2661	3819.9158	3242.0354
160	2	2	0	1	1	0	0	0	0	0	4692.7007	3950.2739	3161.4453	2395.8176	1769.395	1305.3783	1073.3699	1003.7674	910.96405	5720.8677	5646.8516	5597.5073	5498.8193	5252.0986	4832.6738	4265.2168	3451.0396	2316.1257	6231.3882	6200.9761	6155.3584	6109.7407	6033.7114	5972.8877	5881.6523	5638.3579	5182.1807	1687.3046	1480.6967	1297.9281	1154.8918	1019.8021	924.44458	852.92651	781.40839	717.83667	2275.032	1852.5521	1631.2532
161	4	2	0	1	1	1	0	0	0	1	4031.0479	3309.3665	2587.6851	2020.6497	1556.7117	1221.6453	1041.225	886.57892	731.93292	5633.5752	5563.2192	5445.959	5234.8911	4906.563	4367.167	3687.0591	2960.0469	2068.8708	5702.8008	5659.3223	5630.3364	5601.3511	5586.8579	5543.3794	5456.4224	5311.4941	4717.2871	2055.5696	1735.059	1513.167	1315.9297	1155.6744	1007.7465	909.12781	773.52716	526.98053	2992.8857	2442.9785	2113.0342
162	4	0	0	1	1	0	1	0	0	0	5717.8984	4870.626	3932.575	3176.082	2631.407	2177.5112	1663.0962	1239.4601	846.0838	6749.8213	6639.7451	6529.6689	6447.1118	6226.9595	5704.0977	5043.6401	4245.5879	3062.2688	6694.3618	6622.873	6599.0435	6527.5552	6503.7256	6456.0664	6289.2598	5884.1577	4859.4878	2828.6907	2418.1003	2114.6208	1811.141	1543.3649	1293.4404	1097.0712	900.70197	686.48102	4676.1362	4191.1973	3821.72
163	NA	NA	NA	0	0	NA	0	0	0	0	2520.2915	2001.6819	1595.204	1342.9072	1118.6436	964.46234	838.31403	768.23157	740.19861	5522.8633	5401.8892	5135.7456	4724.4326	4192.1455	3514.6892	2764.6482	1990.4122	1337.1508	5555.8345	5453.1289	5206.6348	4775.2695	4241.1992	3748.2107	3337.3872	2967.6458	2495.1987	1813.3234	1192.6543	888.17505	782.77844	735.93549	700.80328	677.38177	642.24957	607.11737	923.54333	813.68903	763.75525
164	2	3	0	1	0	NA	0	0	0	0	5920.3169	5521.2373	5093.6523	4466.5278	3896.4146	3155.2673	2442.6255	1729.984	1045.848	6495.0537	6428.8804	6340.6494	6252.418	6142.1289	5943.6084	5634.7993	5149.5273	4421.6196	6914.5161	6869.9434	6825.3711	6795.6558	6751.083	6676.7954	6572.7925	6439.0747	6097.3516	2248.9727	1832.7572	1544.6082	1304.4839	1160.4093	1032.3431	936.2934	792.21887	600.11945	3301.4985	2432.1995	2045.8442
165	NA	NA	NA	1	1	1	1	0	0	0	6315.6499	6010.4458	4891.3657	3721.4182	2983.8425	2551.4705	2144.5322	1915.6295	1763.0276	6658.2744	6420.4834	6103.4287	5707.1108	5284.3711	4835.2104	4306.7866	3593.4138	2721.5139	6925.9194	6800.1177	6649.1553	6473.0322	6271.749	6045.3052	5693.0596	5215.0117	4409.8789	2569.3992	2071.7	1883.3815	1762.3195	1627.8063	1533.647	1452.939	1358.7797	1251.1691	1965.3475	1739.8396	1627.0856
166	2	0	0	1	1	1	0	0	0	1	387.51459	345.21005	338.80026	317.00702	295.21375	283.67615	258.03702	233.67986	201.63097	6772.002	6009.0439	4773.7783	3356.8557	2121.5901	1285.9692	777.33044	595.67371	486.67972	7631.5449	7555.7681	7501.6421	7447.5156	7371.7393	7274.312	7166.0601	7036.1572	6830.4775	337.75806	310.12735	288.0228	267.76031	247.49779	229.07733	214.34096	201.44664	186.71027	2311.5305	1578.8312	1151.4233
167	1	1	0	0	1	0	1	1	0	0	5371.5786	4643.6914	3859.813	2991.9475	2236.0647	1620.1602	1228.2209	892.27301	612.31647	7006.1919	6662.29	6318.3882	6037.0137	5818.167	5505.5288	5036.5718	4411.2954	3379.5896	7431.0771	7383.9844	7346.3101	7318.0542	7289.7983	7242.7056	7167.3569	7063.7524	6847.125	1300.3076	1090.7256	951.00427	850.09442	787.99603	733.65997	671.56158	601.70093	493.02878	3251.7639	2386.186	2023.2018
168	2	3	0	1	0	NA	0	0	0	1	3855.6213	3105.5642	2526.9487	2034.0541	1669.7406	1391.1479	1176.8459	1048.2646	941.11371	5299.9297	5139.4487	4956.042	4726.7837	4428.7476	4061.9338	3603.4167	2915.6414	2090.3105	5448.1743	5374.7461	5310.4961	5255.4248	5191.1753	5126.9253	5035.1396	4879.1045	4612.9268	1460.1283	1209.3729	1074.3507	968.2619	900.75085	852.52869	804.30646	756.08429	678.92877	3125.2136	2389.6272	2090.7952
169	0	2	0	1	0	NA	1	0	0	0	6125.23	5988.3618	5981.8442	5955.7744	5923.1865	5903.6338	5740.6953	5453.9238	5173.6699	6291.7837	6253.4814	6241.8242	6220.1753	6205.1875	6188.5342	6155.228	6123.5869	6081.9541	6419.3491	6417.6948	6389.5752	6386.2671	6380.4775	6372.207	6368.8989	6368.4854	6355.666	6122.627	6099.4697	6070.5225	6035.7866	6018.4185	5977.8926	5960.5244	5943.1563	5590.0039	6202.3965	6168.5283	6155.8281
170	2	2	0	1	1	1	0	0	0	0	2260.053	1473.4352	942.92554	705.11084	595.35022	522.17651	449.00275	394.12244	320.9487	6658.9326	6565.4209	6378.3965	5817.3237	5193.9092	4165.2754	3354.8369	2201.5205	1235.2283	6810.6895	6776.9639	6743.2388	6726.376	6675.7881	6591.4751	6338.5352	5933.8315	5191.875	1457.8287	1200.6345	997.02234	846.99237	707.67883	621.94739	525.49957	429.05173	332.60388	3026.2756	2552.7693	2279.5923
171	2	2	0	1	1	1	0	0	0	0	5440.27	4464.7856	3206.0959	2041.8081	1349.5288	971.92194	783.11853	688.7168	531.38062	6978.1055	6753.8325	6593.6377	6369.3652	6145.0923	5792.6641	5280.0405	4479.0664	3357.7029	7309.0859	7269.9805	7211.3218	7172.2163	7113.5576	7054.8994	6937.582	6761.6064	6331.4443	1094.0989	886.21143	777.74841	714.47833	669.2854	624.09253	587.93817	551.78387	488.51376	2352.0139	1902.9851	1633.5679
172	1	1	0	1	0	NA	0	0	0	0	3226.6145	2205.4646	1635.9773	1262.8647	987.93982	732.65234	536.2774	398.81491	320.26492	5556.5811	5482.6919	5334.9136	5088.6162	4793.0596	4398.9839	3832.5002	2945.8301	2009.9004	6469.8564	6409.7046	6382.9702	6336.1855	6276.0337	6182.4639	6075.5273	6015.3755	5895.0713	671.97339	616.55499	550.05292	472.46716	428.13245	350.54669	306.21198	284.04462	239.70988	2602.4902	1825.1689	1290.7606
173	1	1	0	0	0	NA	0	0	0	1	3349.2676	1809.0099	1466.7305	1173.348	1051.1053	855.51703	782.17145	684.37732	586.58319	5194.5664	5064.4014	4782.3774	4370.188	3415.644	2699.7363	2374.3235	1766.8866	1267.9205	5190.7847	5157.9419	5125.0991	5103.2041	5081.3091	5048.4668	4993.729	4949.939	4720.0405	1935.8405	1651.7065	1414.9282	1237.3445	1083.4386	988.72723	905.85486	811.14355	692.75439	2354.1355	1971.9656	1786.6711
174	2	2	0	1	0	NA	0	0	0	1	3898.7212	2383.4551	2298.0879	2084.6702	1977.9613	1892.5942	1849.9106	1785.8854	1615.1511	5663.3945	5595.3159	5345.6948	4642.2178	4392.5967	3734.5049	2940.2563	2372.9358	1828.3082	5851.1826	5743.813	5697.7969	5636.4429	5605.7656	5575.0884	5529.0728	5452.3804	5176.2861	2421.1777	2294.6243	2208.0352	2101.4639	2041.5177	1928.2858	1841.6967	1755.1075	1655.197	2818.582	2551.864	2397.4482
175	NA	NA	NA	1	0	NA	1	0	0	0	5241.6597	4933.5571	4676.8052	4420.0532	4188.9766	3983.575	3752.498	3393.0452	2597.114	2617.2417	1318.4716	785.0481	576.31714	460.35553	413.97089	344.39392	321.2016	298.00928	262.99667	244.70985	229.03543	217.71501	200.29898	182.88295	163.72531	148.05089	133.24725	5805.2964	5427.9458	5082.0415	4704.6909	4327.3408	3887.0986	3352.5188	2566.3723	1434.3212	3037.488	1344.2391	709.27075
176	1	2	0	1	1	1	0	0	0	0	4417.7817	3720.3513	2929.9304	2023.271	1163.1071	791.14417	581.9151	512.17206	442.42905	7098.2412	6919.2993	6740.3574	6583.7837	6337.7383	6024.5903	5644.3394	5375.9263	5196.9849	7395.5688	7337.3081	7308.1777	7264.4819	7220.7861	7177.0903	7118.8296	7046.0034	6900.3511	1214.1736	949.29962	782.01074	656.54413	558.95898	475.31454	419.55161	377.72937	335.90717	4512.1011	3113.3716	2223.2708
177	NA	NA	NA	1	0	NA	0	1	0	0	2786.6426	1750.7589	903.21777	451.19577	357.02454	338.19028	319.35602	300.52179	300.52179	271.60526	258.9231	246.81738	234.13522	224.33536	215.68843	208.77089	200.12395	190.90056	176.03516	161.42641	155.94814	138.90459	134.64371	116.99146	99.339218	93.860939	68.904327	1824.9227	800.35535	406.29092	347.18124	307.77481	288.07159	268.36838	248.66516	228.96194	251.65102	231.65007	218.31612
178	NA	NA	NA	1	1	0	0	1	0	0	5009.9849	4368.6309	4067.9961	3927.7	3787.4038	3647.1077	3386.5576	3085.9229	2624.9497	5701.5142	5637.5967	5488.4556	5211.4795	4785.3628	4146.187	3507.0117	2889.1421	2292.5784	5641.3262	5585.165	5472.8433	5323.0806	5135.8774	4892.5137	4518.1074	3993.939	3245.1267	4011.1667	3745.6255	3500.5107	3214.5432	2928.5759	2622.1821	2274.936	1948.1162	1621.2963	2156.7578	1928.6816	1786.1342
179	1	1	1	1	1	1	0	1	0	1	6202.1152	5960.8257	5538.5688	4875.0229	4060.6711	3125.6746	2190.678	1466.8097	923.90839	6369.8462	6228.624	6087.4023	5776.7144	5409.5371	4929.3828	4308.0063	3658.3855	2782.8098	6600.3491	6498.4307	6381.9521	6265.4736	6148.9956	5988.8374	5814.1201	5552.0435	5115.2495	915.55945	771.44037	695.5882	642.49164	612.15082	581.80994	559.05426	536.29865	498.37256	2050.1333	1572.3649	1265.228
180	2	2	0	1	1	1	0	0	0	0	6356.4692	5924.1357	5405.3359	4742.4253	4050.6921	3243.6702	2407.8259	1773.7373	1341.4042	6681.4214	6607.9556	6558.9785	6485.5127	6289.604	5946.7637	5432.5029	4722.3335	3816.2556	7168.1685	7078.7383	7007.1943	6917.7646	6810.4482	6613.7021	6345.4121	5969.8062	5343.7959	1318.5801	1180.7944	1094.6785	1025.7856	965.50452	913.8349	862.16534	810.49573	767.43774	2271.342	1824.9525	1557.1188
181	1	1	0	1	1	1	0	0	1	0	4636.4351	4072.3503	3639.885	3245.0254	2906.5745	2492.9121	2248.4753	2154.4612	2060.4468	5978.7632	5709.0776	5394.4438	5034.8628	4630.3335	4113.4355	3551.5898	2877.375	2248.1077	5994.647	5895.2549	5703.5698	5625.4756	5568.6802	5533.1831	5504.7852	5469.2881	5391.1938	2100.1992	2032.5084	1970.0245	1907.5408	1850.2639	1792.9871	1730.5033	1662.8124	1584.7076	2805.2842	2322.6658	2141.6838
182	3	0	0	0	1	1	0	0	1	0	385.34232	357.87415	338.25403	326.48196	306.86185	278.08566	259.77356	232.3054	200.91321	4836.1797	3557.9048	2613.0928	1890.5894	1334.8175	973.56586	779.04572	640.10272	528.94836	5849.9521	5815.1831	5780.4136	5728.2598	5658.7212	5537.0283	5345.7974	5050.2578	4546.103	294.11923	270.96918	250.97597	235.19185	221.51228	208.88498	196.25769	182.57813	165.74173	928.03229	722.31012	647.50208
183	1	1	0	1	1	1	1	0	0	0	1524.5693	1309.7517	1169.009	1080.119	998.63647	946.78394	894.9314	857.89386	806.04132	5349.7441	5126.437	4858.4688	4501.1772	4099.2246	3518.626	2982.6887	2379.7595	1910.8146	5638.3472	5609.2666	5593.6079	5580.186	5555.5791	5535.4463	5513.0767	5488.4697	5434.7827	1191.9323	1091.4502	1020.5216	949.59308	878.66449	813.64667	772.27167	713.16455	630.41455	4079.8494	3489.7244	3017.6243
184	2	2	0	1	1	1	0	0	0	0	2235.3594	1480.7815	1167.9077	1039.0774	947.05566	891.84265	855.034	799.82098	726.20361	6364.4575	6131.7178	5869.8853	5578.9604	5200.7578	4735.2783	4124.3359	3338.8389	2349.6943	7268.3931	7241.1436	7159.3936	6968.6445	6750.6455	6505.3965	6205.6479	5769.6499	4952.1538	956.68536	869.08551	820.41888	786.35229	757.15234	727.95239	693.88574	659.81915	611.15253	2515.3335	1490.0088	1095.6531
185	NA	NA	NA	0	0	NA	0	1	0	0	4501.8813	3965.7439	3546.1582	3219.8135	2940.0896	2706.9866	2497.1936	2287.4006	1914.4355	1079.0654	673.83051	518.63416	449.65802	397.9259	363.43784	346.19379	328.94974	311.70572	294.48117	286.12497	277.76877	270.17221	261.05637	253.45979	239.02635	221.55428	200.28394	5835.6523	5506.8066	5248.4277	4966.5601	4708.1816	4426.314	4073.9792	3627.6887	3063.9536	1590.7892	867.90674	556.31952
186	2	0	0	0	1	1	0	0	0	0	1014.0466	844.84064	767.92883	691.01703	614.10522	567.95819	521.8111	475.664	414.13455	4320.1064	3608.1096	2919.8462	2279.0491	1709.4515	1258.5203	973.72156	783.85571	688.92285	5523.5278	5429.479	5354.2393	5279	5184.9507	5072.0918	4921.6128	4695.8945	4300.8877	614.83679	544.11945	511.48068	489.7215	473.4021	451.64294	424.44397	391.80521	359.16641	1314.4269	959.75995	803.70654
187	0	1	0	0	0	NA	0	0	0	0	4890.0845	4025.8918	3233.7156	2537.5608	1937.4272	1601.3524	1337.2937	1097.2402	953.20819	6074.7109	6021.7437	5942.2925	5809.8735	5598.0039	5306.6826	4882.9429	4194.3657	3002.5977	7001.9609	6584.958	6232.1099	6103.8013	6071.7241	6039.647	6007.5698	5975.4927	5889.9536	1695.2399	1404.4331	1093.5708	953.18134	832.84747	752.62494	702.48584	642.31897	582.15204	3510.4658	2574.3486	1924.2672
188	4	2	0	0	1	1	0	0	0	1	2224.1177	1223.467	759.75079	637.72021	564.50189	515.68964	466.87744	344.84686	296.03464	5561.2383	5431.2656	5093.3354	4521.4541	3793.6052	2909.7886	2077.9612	1402.1013	960.19305	6153.103	6081.9087	5986.9834	5844.5947	5678.4751	5441.1611	5156.3843	4776.6821	3661.3066	539.26813	505.97037	479.33215	452.69394	423.83588	388.31824	350.58075	312.84329	270.66611	748.58319	687.15332	659.85114
189	1	2	0	1	1	1	1	0	0	0	1199.7308	1147.9694	1122.0885	1096.2078	1070.327	1057.3866	1018.5655	940.92316	759.75781	6568.8545	6511.3281	6396.2764	5993.5942	5332.0449	4354.1025	3203.5823	2110.5879	1305.2235	7220.7974	7120.5171	6744.4658	6443.6245	6167.854	5716.5923	5114.9106	4337.7383	3485.3555	1102.1624	1040.9149	993.27808	959.25171	925.2254	891.19904	850.36737	802.73053	734.6778	1330.2999	1167.8668	1067.313
190	3	0	0	0	0	NA	1	0	0	0	6254.1685	6226.4189	6213.2046	6202.6338	6192.0625	6180.1694	6168.2769	6152.4199	6132.5991	6303.0713	6291.9126	6283.5439	6275.1753	6266.8062	6252.8584	6238.9102	6222.1724	6195.6714	6297.4175	6273.4956	6251.7485	6221.3022	6197.3804	6173.4585	6145.1875	6119.0908	6064.7231	6297.2544	6281.062	6264.8696	6256.7734	6232.4854	6216.293	6192.0044	6159.6196	6111.043	6331.1494	6317.6138	6304.0786
191	2	1	0	1	1	1	0	1	0	1	2641.0032	2170.9229	1978.6173	1829.0464	1679.4753	1572.639	1444.4353	1209.3951	952.98779	5804.9556	5537.5967	5027.1841	4370.9395	3763.3057	3204.2825	2693.8701	2256.3738	1867.488	7057.0229	6870.0327	6629.6167	6415.9136	6175.4976	5881.6558	5400.8237	4679.5757	3584.3469	1382.0662	1274.5519	1183.5782	1084.3344	993.36072	894.11676	794.87286	670.81787	521.95197	1743.3744	1610.3807	1527.2596
192	1	2	0	1	0	NA	0	1	1	0	5642.1445	4903.2271	4190.6992	3478.1714	2871.2034	2343.405	1947.5562	1604.4873	1314.1982	6153.9541	6105.0259	6031.6338	5909.3135	5664.6724	5273.2466	4832.8931	4147.8979	3267.1907	6735.6855	6422.8457	6158.1353	5893.4248	5604.6494	5267.7451	4882.7114	4377.355	3679.4819	1429.0465	1230.2736	1126.9117	1031.5006	959.94238	896.33508	840.67865	777.07129	689.61121	2339.1865	1838.568	1620.9077
193	4	2	0	1	1	1	0	0	0	0	4159.8335	3049.6172	2325.563	1891.1304	1673.9141	1504.9681	1384.2925	1263.6167	973.99506	5551.1729	5362.375	5102.7778	4748.7822	4276.7876	3710.394	3096.801	2554.0073	2034.8132	6237.0747	6201.4102	6165.7451	6094.4155	5987.4214	5862.5947	5648.6064	5309.791	4739.1553	1662.6338	1434.9745	1286.501	1197.417	1118.2311	1029.147	949.96118	860.87714	732.20013	1896.9177	1659.4285	1516.9348
194	2	2	0	1	0	NA	1	0	0	1	5017.4536	3731.4307	2965.2893	2418.0457	2062.3372	1816.0775	1624.5422	1460.3691	1296.1959	7087.7554	6792.6616	6604.8745	6497.5674	6390.2607	6095.1665	5558.6323	4941.6177	4270.9492	7241.7251	7211.7197	7163.7109	7085.6968	7001.6812	6917.666	6827.6499	6749.6357	6647.6172	1926.3828	1655.1772	1468.7234	1299.2198	1163.6171	1044.9646	943.26251	841.56042	722.90796	4133.3989	3228.6155	2652.844
195	4	2	0	1	1	1	1	0	0	0	5723.6777	5117.1636	4431.5391	3825.0249	3297.6216	2770.218	2269.1846	1873.632	1557.1898	6437.8159	6272.1567	6051.2783	5802.7896	5443.8613	4974.4941	4367.0776	3594.0017	2627.657	6759.7041	6686.8071	6613.9106	6516.7148	6443.8179	6322.3232	6103.6328	5666.252	4912.9849	2562.1162	2278.4604	2112.9946	1959.3478	1829.3389	1711.1489	1604.7781	1451.1312	1250.2084	2677.2568	2287.6257	2047.8527
196	3	0	0	1	0	NA	0	0	0	0	636.01514	560.21185	459.95593	447.72958	420.83167	349.91891	325.46625	313.23993	288.78726	5416.9482	5115.6934	4186.8252	3483.8975	2630.3425	2153.3557	1751.6829	1249.5918	1073.8599	5649.4346	5619.8735	5596.2246	5572.5757	5543.0142	5507.5405	5460.2427	5383.3833	5229.665	452.97855	413.37097	385.07983	337.92792	319.06717	296.43427	279.45956	266.25705	249.28235	3349.9473	2741.8315	2352.6375
197	3	2	0	1	1	1	0	1	0	1	3434.6167	2837.0852	2193.5898	1779.9143	1412.2026	1136.4188	883.61707	722.74323	469.94144	5800.3291	5604.2432	5383.6465	5015.9849	4623.8125	3913.0005	3300.2314	2736.4839	2123.7148	6492.2383	6329.0874	6227.1182	6186.3306	6145.543	6043.5737	5839.6357	5513.3345	4799.5503	1638.5753	1351.6842	1208.2386	1085.2853	993.07019	900.85516	767.6557	644.70233	460.27231	2561.2544	2159.989	1959.3564
198	1	2	0	1	1	1	1	0	0	0	2215.4773	1604.5292	1382.3662	1178.7168	919.52673	678.85022	419.66013	290.06506	234.52434	4421.0762	4068.6938	3794.6187	3246.468	2815.7783	2502.5496	2091.4365	1817.3613	1621.5933	6224.3633	6180.6938	6071.52	5940.5117	5722.1641	5460.147	5132.6255	4630.4263	3931.7139	1823.4551	1504.8665	1268.875	1127.28	985.68512	796.89185	667.0965	442.90457	265.91092	2222.4529	1965.0531	1707.6534
199	2	3	0	1	1	1	0	0	0	0	4323.1353	3534.4451	3008.6516	2626.2561	1980.9641	1694.1676	1455.1705	1192.2737	1096.6749	7004.7998	6767.1387	6559.1855	6232.4014	5905.6177	5400.5874	4925.2656	4182.5747	3380.4683	7333.9331	7291.5679	7228.02	7122.1074	7058.5596	6867.917	6592.5435	6253.6226	5300.4082	1973.6556	1397.0399	1190.0496	1027.4144	938.70428	835.20917	790.85413	716.92902	657.78894	4700.8198	3425.8743	2788.4014
200	1	2	0	0	1	1	1	0	0	0	3959.1951	3215.9587	2596.5952	1874.0044	1502.3862	1254.6409	1068.8318	986.24994	841.73181	5128.0581	5049.8042	4971.5498	4795.478	4580.2793	4247.6987	3836.8645	3328.2124	2584.7976	5170.8384	5143.4697	5122.9434	5109.2593	5095.5752	5081.8911	5061.3647	4992.9434	4808.2061	1550.4431	1368.3947	1252.5457	1144.9716	1062.2223	987.74792	913.27356	847.0741	780.87469	2326.7856	1956.257	1750.4076
201	2	0	NA	0	0	NA	1	0	0	1	137.43819	129.88289	124.68861	119.96655	115.24448	110.0502	104.85593	98.245041	86.439873	220.69826	207.46764	197.68848	189.0598	179.85588	171.80246	164.32428	156.27086	148.79268	523.50891	400.2579	367.39099	334.52405	305.76547	277.00693	260.57346	248.24835	231.81488	142.47438	135.03281	129.57565	123.62241	118.66136	113.70032	108.73927	101.79381	88.895088	223.88947	211.16626	199.1499
202	3	0	0	0	0	NA	1	1	0	0	1742.972	763.66479	486.1944	420.90726	404.58545	388.26367	371.94189	355.62009	339.29831	318.97537	303.20764	290.44327	281.43311	273.1738	264.16367	254.40268	242.38914	230.37563	210.65678	205.54498	201.00117	195.88937	190.20959	182.2579	173.17027	164.08263	149.88319	2931.9421	2028.4581	1124.9741	673.23218	457.18164	398.25876	358.97687	339.33591	300.05399	308.43048	289.31827	272.93637
203	1	2	0	0	0	NA	0	0	0	0	1013.5804	777.37848	656.08557	528.40881	470.95432	394.34827	349.66141	311.35837	266.67151	6436.6787	6347.5005	6169.144	5931.3354	5604.3486	5217.9097	4474.7578	3374.8931	2156.1238	6553.3442	6539.6021	6525.8599	6512.1177	6498.3755	6484.6333	6466.3105	6443.4072	6402.1807	430.11404	392.53546	365.20557	341.2919	320.79449	300.29706	279.79965	259.30225	238.80482	5928.3228	4769.6416	3548.3284
204	4	2	0	1	1	1	0	1	0	0	2686.6206	1741.8682	1257.9706	935.37213	797.11566	658.85919	497.56	382.34628	313.21805	7234.5015	7073.7178	6880.7773	6655.6807	6527.0537	6237.6431	5755.2925	4854.9048	3472.166	7421.8857	7401.7661	7389.6948	7377.623	7365.5518	7349.4561	7329.3369	7313.2417	7289.0981	675.82739	621.00055	573.0271	531.90692	483.93347	394.83984	326.30627	292.03952	264.6261	5599.4067	3960.0818	2901.3508
205	1	2	0	0	1	1	0	0	0	0	6568.1489	6130.0938	5523.5557	4782.2314	3872.4241	3131.0999	2490.865	2153.8994	1008.2164	7277.042	7221.2905	7193.415	7137.6636	7054.0366	6914.6582	6719.5283	6329.2686	5353.6191	7300.9116	7272.4639	7258.2397	7229.792	7201.3442	7158.6729	7073.3296	6874.1958	6461.7036	1975.9966	1807.5317	1660.1249	1523.2471	1375.8403	1196.8463	986.26514	723.03864	470.34125	3402.1404	1854.0912	1483.9055
206	4	NA	NA	1	1	1	0	0	0	0	1903.6664	913.01184	842.25079	771.48981	747.90277	700.72876	653.55475	441.27161	323.33655	6434.3535	5859.7808	5572.4941	5189.4458	4646.7939	3880.6965	3082.679	2188.8989	1454.7225	7167.0757	7130.9546	7076.7729	7040.6519	6986.4702	6914.2275	6823.9248	6733.6221	6534.9561	1135.4667	945.14764	827.01855	735.14044	669.51318	630.13678	584.19769	525.13318	439.81775	1874.9952	1244.0635	1014.6338
207	NA	NA	NA	0	0	NA	1	0	0	0	2528.0662	1711.4568	1153.7722	815.1781	616.00507	516.41852	436.74933	357.08011	297.32819	6206.4341	6177.79	6120.5015	5919.9927	5576.2627	5060.6685	4373.209	3427.9521	2167.6099	6255.3853	6241.5762	6227.7666	6213.9575	6200.1484	6172.5303	6131.1025	6006.8198	5606.3535	689.06262	598.48834	539.14655	467.31177	417.33975	382.98398	342.38171	311.1492	286.16321	2196.511	1740.8518	1462.3934
208	2	2	0	1	1	1	0	0	0	0	6246.6235	5842.7012	5265.6689	4486.6753	3649.9785	2784.4302	1947.7335	1457.2561	995.63031	6719.4126	6602.1016	6543.4463	6484.7905	6426.1353	6279.4961	5839.5796	4930.418	3258.7346	6702.564	6595.7471	6549.9688	6488.9307	6458.4116	6427.8926	6382.1143	6336.3354	6183.7402	2599.356	2275.8318	2006.2281	1700.6775	1484.9946	1305.2589	1143.4968	999.70825	873.89325	2925.8428	2442.2747	2200.4907
209	3	NA	NA	0	1	0	0	1	0	0	2837.1516	2522.271	2119.9238	1857.5233	1612.6162	1402.6958	1227.7622	1017.8419	842.9082	4604.4204	4066.3752	3601.7	3039.1982	2525.6099	2012.0214	1547.3461	1204.9537	935.93121	5651.7388	5632.0503	5612.3618	5579.5474	5540.1704	5494.2305	5382.6616	5225.1533	5021.7046	2384.3557	2171.3313	1875.4637	1591.4309	1331.0675	1082.5388	881.34894	727.4978	609.15082	2136.9368	1770.1997	1525.7083
210	1	1	0	0	0	NA	1	0	0	0	2084.8826	1685.4404	1255.2717	886.55579	625.38196	471.75034	348.845	256.66602	241.30284	5972.4375	5488.458	4950.7021	4305.396	3660.0894	3041.6707	2477.0276	2019.9354	1643.5067	6275.0068	6209.3462	6169.9497	6104.2886	5999.231	5881.0415	5723.4551	5487.0762	5066.8462	746.9469	647.05212	572.13098	480.56076	422.28879	355.69226	305.74484	255.79744	222.49918	2377.8879	1958.2588	1678.5061
211	NA	NA	NA	1	0	NA	0	0	0	0	954.70282	591.69202	489.10202	433.86124	418.07819	402.2951	394.40356	386.51202	370.72894	346.9545	334.28531	324.28329	315.6149	306.27972	296.27771	286.27573	276.94052	262.27094	228.0808	212.38776	195.33009	178.27245	160.53249	133.24025	127.7818	122.32335	112.08875	539.02924	451.67523	410.56747	390.01361	374.59821	359.1828	343.7674	328.35196	302.65964	315.88507	298.97519	285.96762
212	2	2	0	1	0	NA	0	1	0	0	5336.4458	4401.7656	3329.6328	2230.009	1460.2725	1075.4042	882.97003	745.51709	553.08295	7048.5093	6475.0112	6028.957	5774.0688	5646.625	5455.459	4850.0996	3926.1301	2524.2456	7259.2051	7230.895	7212.0215	7193.1479	7164.8374	7117.6538	7051.5967	6957.229	6759.0571	951.9986	823.06506	754.30048	711.32263	668.34479	633.96252	590.98468	522.22015	436.26447	3863.844	2925.4839	2229.2813
213	1	2	0	1	1	1	0	0	0	0	5919.9116	5506.9258	4769.4507	3795.9839	2645.5232	1819.5513	1288.5693	875.58344	580.59344	7081.3257	6897.7261	6744.7261	6561.1265	6377.5269	6102.127	5551.3281	4572.1294	3286.9312	7199.9424	7158.6401	7117.3384	7084.2969	7042.9946	7001.6929	6935.6099	6844.7451	6646.4956	846.23456	722.70868	642.41681	599.18274	568.30127	537.4198	506.53833	469.48053	432.42276	3206.9802	2462.6917	2016.1188
214	3	0	0	1	1	1	1	0	0	0	282.26035	278.60727	271.823	260.34192	254.07951	239.98911	224.33308	216.50508	200.84906	1072.6156	630.32843	549.48022	440.09741	406.80698	383.02811	349.73767	330.71457	311.69147	5591.0654	5554.8433	5536.7319	5265.0625	5192.6172	4124.0508	3961.0491	2584.5906	2367.2549	251.33089	234.89958	224.72783	213.77362	204.38429	195.77742	186.38811	178.56367	166.82701	820.73175	568.72668	474.22476
215	1	2	NA	1	0	NA	0	0	0	0	5164.9785	4339.7407	3127.6729	2018.7596	1090.3672	806.69177	651.95972	471.43896	342.49557	5985.9517	5643.5796	5594.6694	5570.2139	5545.7588	5521.3037	5472.3936	5178.9316	4396.3667	6510.8906	6502.3691	6491.7173	6485.3262	6481.0654	6472.5439	6464.0225	6453.3706	6419.2852	843.54254	772.91718	718.58997	680.56091	631.66638	571.90643	523.01196	387.19394	327.43399	3477.3572	2724.7134	2187.1106
216	NA	NA	NA	0	1	0	0	0	0	0	2425.3977	1535.6234	1098.5413	801.94989	692.67938	614.62897	567.79877	505.35849	396.08795	6318.6787	6258.2319	6167.5625	6016.4463	5472.4287	4747.0718	3931.0452	2782.5632	1513.1885	6617.3286	6591.8608	6566.3931	6515.458	6489.9902	6489.9902	6413.5874	6057.04	5140.2046	685.53436	588.30316	524.89154	444.57007	398.06818	360.02118	330.42908	300.83698	271.24487	1474.5934	995.00073	869.88965
217	4	2	0	1	1	0	0	0	0	0	7259.439	7233.2949	7207.1504	7181.0063	7089.5015	6958.7808	6814.9873	6592.7617	6226.7427	7125.3481	7012.355	6871.1138	6673.3755	6503.8857	6306.1479	5910.6719	5289.2095	4215.7744	6326.5151	5938.6719	5461.3262	4536.4697	3551.9446	2686.7561	2000.572	1582.8948	1165.2175	6196.0112	5786.8633	5449.9185	5040.7705	4655.6904	4270.6104	3765.1924	3259.7747	2778.4243	3617.4631	2810.6396	2309.8525
218	2	2	NA	1	0	NA	1	0	0	0	7318.3682	7252.792	7209.0747	7165.3574	6957.7007	6881.1953	6793.7607	6542.3867	6444.0225	6026.772	5670.6714	5341.9634	4985.8628	4657.1543	4301.0537	3835.3835	3205.3591	2383.5884	3227.7195	2709.824	2211.8479	1793.5477	1435.0049	1076.4619	797.59521	518.72845	319.53796	7004.1846	6745.3281	6439.4072	6180.5508	5874.6294	5498.1108	5145.125	4721.5415	4203.8286	4359.999	3467.3691	2909.4756
219	1	2	0	1	0	NA	0	0	0	0	3012.0759	1824.1727	1180.7253	883.74951	760.00958	685.76569	636.26971	586.77374	537.27777	6205.0391	6148.6572	6092.2754	5951.3213	5669.4121	5274.7397	4654.5405	3639.6687	2060.9792	6271.5894	6260.3384	6249.0869	6226.5845	6204.082	6181.5796	6136.5752	6035.3145	5799.0391	606.58624	570.30975	543.92682	524.13959	507.6503	491.16095	471.37375	448.2887	415.31003	2301.2629	1503.3438	1168.7324
220	2	0	0	1	0	NA	0	0	0	0	304.67569	303.29504	298.46283	290.17899	278.4436	275.68231	254.28246	232.8826	205.96019	1059.6228	768.81757	652.49548	536.1734	458.62537	429.54483	400.46432	361.69028	332.60977	6192.0313	5620.3296	5490.3975	5256.5195	4944.6826	4424.9536	3463.4556	2527.9438	1930.2559	288.76923	279.50031	269.61349	262.19836	250.45776	243.66057	228.83032	212.76424	194.22643	801.44519	712.78253	539.67932
221	2	2	0	1	0	NA	0	0	1	0	4943.123	3824.8789	2324.0776	1588.3906	999.84113	734.99384	529.00146	411.29153	323.00912	6657.7168	6363.8159	6004.6035	5841.3252	5547.4243	4894.311	4045.2637	2934.9709	1694.0557	7359.1021	7320.9146	7282.7271	7263.6333	7225.4458	7129.9771	6900.8516	6518.9761	5755.2256	473.78296	432.35989	402.44321	377.12912	351.815	331.10345	305.78937	282.77655	259.76373	1251.059	901.77808	746.54211
222	3	2	0	1	0	NA	0	1	0	0	4460.459	2984.8987	1700.615	962.83496	826.20898	744.23346	716.90826	689.58307	634.93268	6096.042	5984.3877	5816.9058	5426.1152	4700.3604	3583.8152	2327.7017	1434.4655	959.93372	6114.0952	6044.6934	6021.5596	5952.1577	5790.2202	5558.8809	5165.6035	4610.3892	3777.5674	1610.401	1194.351	942.78589	817.0033	729.9231	681.54517	652.51843	623.49164	584.78931	2069.4492	1654.5909	1319.5131
223	NA	NA	NA	1	0	NA	1	0	0	1	2935.3767	1551.8501	1149.6621	618.77393	506.16129	393.54865	329.19858	297.02353	264.84848	6523.8745	6196.3276	5749.6729	5600.7881	5541.2339	5392.3491	5064.8018	4499.0391	3278.1824	6554.7793	6545.7705	6536.7612	6518.7437	6509.7344	6500.7256	6491.7163	6473.6987	6419.6445	524.5636	458.67444	402.66864	353.25177	317.01276	293.95154	270.89035	247.82913	221.47348	2742.2153	1959.0723	1657.8634
224	4	2	NA	1	1	1	1	0	0	0	6465.2656	6317.5459	6110.7388	5785.7559	5313.0532	4515.3677	3688.1379	2801.8206	1974.5911	6573.0981	6490.3848	6380.1006	6242.2451	6049.2471	5745.9648	5387.54	4891.2598	3926.2708	6930.3452	6780.0723	6573.4463	6498.3101	6385.605	6272.8999	6122.627	5859.6489	5333.6929	2927.0825	2598.2429	2318.7292	2039.2155	1743.2598	1480.1881	1184.2324	970.48663	806.06677	3835.8118	3128.0115	2647.7183
225	3	0	NA	1	0	NA	1	0	0	0	480.98749	429.24765	389.92535	369.2294	344.39429	327.83752	305.07199	282.30646	255.40173	5557.958	5220.3818	4649.0986	3766.2065	2909.282	2104.2922	1429.1394	909.79114	702.05182	5684.0776	5652.9536	5606.2676	5559.5815	5497.3335	5435.0859	5341.7139	5186.0938	4874.854	424.46246	372.03806	334.59204	309.62802	289.6568	269.68561	247.218	217.26118	167.33316	1815.8932	1251.2098	979.32526
226	1	2	0	1	0	NA	0	1	0	0	5600.7939	4353.5718	3106.3494	2149.1787	1511.0651	1104.9926	901.95642	785.93573	669.91504	6267.9736	6215.1157	6162.2578	6109.4004	5924.3975	5580.8218	5078.6719	4338.6621	3096.5022	6773.0063	6532.6108	6379.6318	6314.0693	6270.3613	6204.7988	6106.4551	5964.4033	5767.7163	1319.2334	1045.3046	916.39691	827.77289	771.37579	723.0354	682.75177	650.52484	610.24121	2959.7654	2337.5786	2050.4155
227	2	2	0	1	1	1	0	0	0	0	555.25641	509.16852	482.83258	463.08066	449.91269	443.3287	430.16074	410.40878	377.48889	3344.0723	3075.9292	2776.24	2413.4583	2003.3571	1593.256	1167.3818	820.37317	599.5495	3881.8074	3815.6868	3716.5059	3661.4053	3573.2444	3518.144	3452.0234	3341.8223	3110.4001	543.84668	458.86975	420.2439	393.20581	377.75546	358.44254	335.267	308.22891	258.01529	1146.2338	983.64771	879.12811
228	1	2	0	1	1	1	0	0	0	0	1008.9512	784.52228	700.36139	662.95654	644.25415	634.90295	616.2005	588.14691	503.98602	3814.2363	3520.3687	3191.9285	2811.6289	2414.0432	1930.0259	1428.7222	979.2774	719.98236	4262.6162	4223.542	4192.2827	4153.2085	4114.1343	4067.2451	4004.7266	3903.1335	3699.9478	680.29382	643.27301	608.42987	582.29755	560.52063	538.74371	514.78906	479.94595	434.21439	1786.8014	1440.1902	1180.2318
229	4	2	0	1	0	NA	1	0	0	0	3398.6265	2405.6248	1728.5779	1344.9181	1141.8041	1028.963	938.69012	848.41724	667.8714	6314.4907	5953.9351	5648.8496	5537.9092	5316.0288	4844.5327	4095.6865	3069.4895	2043.2924	7159.9966	7150.0146	7120.0688	7080.1411	7010.2676	6850.5566	6581.0439	6451.2788	6401.3691	1824.7191	1411.0392	1149.0419	983.56989	873.25519	790.51923	707.78326	625.04724	528.52191	2917.4897	2059.4678	1716.2592
230	4	NA	NA	1	1	1	0	0	0	1	4879.0601	3783.012	2549.9578	1755.323	1234.7001	905.88562	741.47839	604.47241	494.86758	6459.0464	6013.7236	5751.769	5594.5962	5542.2051	5463.6191	5175.4688	4599.1689	3787.1099	7310.1733	7185.083	7080.8413	6914.0542	6768.1157	6497.0874	6080.1201	5475.5176	4724.9766	1007.4145	903.3396	836.43427	776.96289	717.49152	650.58618	598.54877	524.20953	464.73813	3060.1765	2704.208	2437.2317
231	2	2	0	1	0	NA	0	0	0	0	341.84311	313.79364	311.63599	291.49792	289.34027	268.48297	264.8869	245.46803	222.45308	2587.311	1676.9071	1416.7917	853.20831	708.69977	564.19122	506.38782	434.13351	405.23181	6683.8857	6156.7227	5576.8433	5260.5454	4865.1729	4575.2329	4258.9351	3942.6372	3494.5486	322.88214	307.14545	291.40875	279.81329	267.38959	254.13763	241.71393	225.97722	212.72527	1254.9838	980.49084	737.67023
232	2	2	0	1	1	1	0	1	0	0	5951.8281	5707.7764	5382.3735	5002.7368	4514.6323	3863.8269	3104.5535	2101.2283	1260.6042	6684.9844	6463.9614	6215.3105	6077.1714	5911.4043	5635.1255	5275.9634	4723.4063	3728.8035	7556.5752	7373.6768	7216.9067	7060.1367	6903.3667	6694.3403	6328.5435	5884.3623	4943.7422	1054.1942	932.64685	855.29846	788.99988	755.85059	711.65155	678.50226	645.35297	601.15393	2643.1516	1870.4347	1470.7535
233	NA	NA	NA	0	1	1	0	0	0	0	1864.7616	1450.3534	1232.2438	1134.0944	937.79578	861.4574	610.63135	479.76556	392.52173	7178.6118	6753.1885	6570.8643	6449.3149	6358.1528	6084.6665	5446.5317	4291.812	2833.218	7376.877	7360.5449	7338.7686	7316.9927	7267.9961	7235.332	7186.3359	7148.228	7099.2314	856.36926	757.42761	615.46796	550.9408	447.69736	413.2829	378.86841	357.35938	335.85031	4232.6108	3255.3884	2614.0862
234	NA	NA	NA	0	1	0	0	1	0	0	5295.5576	5005.1162	4678.3691	4369.7749	4061.1807	3734.4338	3425.8394	3117.2451	2808.6509	5620.2539	5388.1045	5155.9551	4885.1138	4556.2354	4169.3193	3801.7493	3356.7959	2950.5342	6537.7358	6423.1035	6270.2603	6136.5225	5926.3628	5754.4141	5525.1494	5162.1465	4550.7734	2548.1978	2402.4971	2308.8323	2246.3889	2194.353	2142.3169	2079.8738	2007.0233	1871.7297	2969.0469	2718.9529	2552.2236
235	3	2	0	0	1	1	0	0	0	0	495.9389	461.55716	418.58002	392.7937	373.88376	348.09747	330.90662	298.24396	270.73859	6375.3521	6029.6826	5526.8906	4929.8247	4112.7881	3170.0527	2290.1667	1504.5541	750.36603	6401.0459	6294.6543	6249.0576	6203.4614	6188.2622	6142.666	6081.8706	5914.6836	5580.3091	404.24475	360.996	338.09961	315.20322	299.93896	279.58661	256.69022	228.70573	203.2653	1704.5693	1465.0436	1280.793
236	NA	NA	NA	0	0	NA	0	0	0	0	5320.9756	4785.9507	4117.1699	3020.3689	1896.8168	1281.5382	960.52332	826.76709	746.51337	6105.7603	6005.8442	5830.9902	5581.1997	5256.4712	4781.8687	4182.3701	3383.0393	2458.8127	6204.4565	6170.9082	6154.1343	6137.3604	6137.3604	6120.5859	6087.0381	5885.7495	5399.3018	1070.4597	924.50269	851.52417	801.00061	761.70447	739.24951	711.18091	688.72595	666.27106	1710.2706	1446.8339	1298.6506
237	2	2	0	0	1	1	0	0	0	0	4595.3799	3975.9175	3414.5293	2911.2158	2543.4099	2291.7532	2117.5293	2001.3801	1865.8727	6036.5537	5875.0771	5644.3955	5413.7144	5090.7607	4721.6709	4237.2402	3614.4009	2853.1528	7065.4077	6871.6367	6677.8657	6503.4717	6309.7007	6135.3066	5980.2896	5747.7646	5282.7139	2199.0645	1974.9149	1838.4761	1741.0198	1653.3091	1575.344	1497.379	1409.6683	1302.4663	2585.2383	2237.0122	2021.4438
238	2	0	0	0	0	NA	1	1	0	0	6236.1885	6216.2305	6200.708	6187.4028	6171.8804	6155.249	6139.7266	6124.2036	6106.4639	6232.7793	6208.0879	6187.5122	6168.9937	6154.5903	6140.187	6123.7266	6107.2656	6086.6895	6218.4106	6186.2451	6160.1108	6142.0181	6127.9458	6115.8838	6099.8008	6085.7285	6069.646	6201.2329	6176.9058	6164.7417	6152.5781	6128.251	6116.0874	6103.9233	6079.5962	6055.269	6273.5674	6249.8638	6226.1602
239	2	2	0	0	1	1	1	1	0	0	5667.3247	5202.5068	4710.3472	4136.1602	3561.9736	3042.4714	2413.6001	2003.4668	1675.3601	6123.3135	5971.2637	5793.8726	5591.1401	5363.0654	5084.3081	4678.8428	4146.6694	3259.7136	6189.3511	6153.3633	6124.5732	6110.1777	6088.5854	6066.9927	6038.2021	5987.8193	5800.6831	1963.0414	1709.6863	1573.2643	1475.8199	1417.3534	1378.3757	1319.9092	1280.9314	1202.976	4245.8633	3222.019	2622.6953
240	2	2	0	0	1	0	1	1	0	0	5857.0215	4853.9009	3599.9998	2534.1841	1875.8861	1405.6732	1092.198	747.37518	465.24747	6644.0942	6585.7446	6556.5703	6527.3955	6469.0459	6323.1729	6148.1245	5681.3296	4718.5654	6921.3281	6753.4751	6622.9224	6538.9961	6483.0449	6427.0942	6399.1187	6371.1431	6343.1675	1758.6816	1285.318	1023.7222	874.23901	762.12653	674.92798	587.72943	488.07391	375.96146	3890.0278	2820.5471	2226.3909
241	0	2	0	0	0	NA	0	0	0	0	5752.4517	5488.1323	5175.7549	4767.2617	4310.7104	3734.0139	3109.2595	2484.5049	1979.8956	6192.5825	6136.6416	6062.0537	5968.8193	5800.9971	5558.5869	5185.6484	4607.5938	3936.3047	6276.373	6141.9858	6088.231	6034.4761	5940.4048	5832.895	5671.6304	5470.0493	5160.9585	2007.1443	1806.4753	1658.614	1563.5603	1479.0681	1415.699	1352.3298	1299.5222	1225.5916	2647.4016	2378.7881	2189.1785
242	2	2	0	0	1	1	0	1	0	0	1340.9861	1216.5295	926.1308	855.01276	748.33569	594.24652	481.64297	428.30441	380.8924	5338.3364	5001.4624	4597.2129	4013.2971	3406.9231	2755.6323	2418.7578	1992.0502	1745.0089	7329.6895	7223.1895	7104.856	6880.0229	6678.856	6525.0225	6276.5225	6146.356	5897.856	858.77185	787.93774	683.76996	592.10229	521.26819	450.43408	396.26685	358.76642	317.0993	3572.4038	3108.2644	2760.1599
243	3	0	0	0	1	0	1	1	0	0	5670.397	4768.688	3577.1445	2288.989	1322.8724	872.01807	678.79474	549.97919	453.36755	7153.5728	7067.0146	6893.8984	6691.9292	6518.813	6316.8442	6028.3169	5710.937	4931.9136	7185.8418	7166.6094	7137.7612	7089.6807	7003.1353	6945.4385	6868.5098	6762.7319	6570.4097	900.02094	747.11682	680.22131	622.88226	584.65625	536.87372	479.53473	431.7522	374.41318	4931.9658	3204.1116	2018.329
244	3	2	0	0	1	1	1	0	0	0	6086.7861	5732.9058	5324.5825	4861.8164	4371.8286	3854.6191	3255.7451	2765.7573	2302.991	7196.8267	7115.3833	7006.7925	6843.9063	6735.3149	6626.7241	6382.3945	5920.8833	5052.1563	7282.4028	7214.5928	7153.2412	7098.3477	7053.1411	7014.3931	6975.6445	6927.209	6859.3994	2851.4402	2375.5942	1979.0559	1714.697	1503.21	1291.7229	1159.5435	1027.364	895.18457	6833.6636	6396.1577	5723.0728
245	2	3	0	0	1	1	1	0	0	0	5356.5776	4768.0938	4099.3628	3403.8821	2735.1506	2200.1655	1772.1774	1424.4371	1130.1953	7012.186	6691.4927	6338.73	5921.8286	5504.9272	4959.7485	4254.2231	3484.5588	2458.3401	7587.7935	7525.6372	7484.2002	7401.3257	7256.2954	7131.9834	7059.4683	6955.8755	6821.2041	1744.2852	1493.3347	1280.0267	1129.4564	991.43365	878.50592	790.67322	715.38806	652.65045	4020.1294	3197.054	2617.8528
246	3	0	0	0	1	1	1	0	0	0	3324.0713	1540.9193	847.47137	649.34338	500.74734	401.68335	376.91736	327.38535	302.61935	6286.4453	6020.0283	5664.8057	5605.6021	5576	5398.3887	4895.1567	3829.4888	2201.385	7272.519	7183.8896	7095.2607	6971.1797	6838.2363	6714.1553	6572.3486	6421.6792	6200.1064	517.51917	478.98105	448.70111	426.67935	399.15213	371.62491	341.34497	313.81775	291.79599	4409.4116	3371.552	2511.6113
247	1	2	0	0	1	1	1	1	0	0	5463.4995	5381.8379	5267.5122	5120.5215	4859.2056	4434.5664	3993.5955	3536.292	3111.6531	6093.5596	5975.3716	5637.6909	5536.3867	5485.7349	5435.0825	5350.6626	5148.0542	4725.9536	6778.3403	6748.2183	6710.5654	6544.8936	6371.6909	6221.0801	6145.7744	6100.5913	6010.2246	2724.542	2334.7236	2139.8145	1989.8845	1854.9474	1749.9963	1645.0453	1540.0942	1390.1642	3713.5337	3041.384	2615.6895
248	2	1	0	0	1	1	0	0	0	1	646.93036	558.34485	449.51123	426.73212	373.58081	355.86371	333.08459	317.8985	292.58835	6364.5317	6013.5889	5428.6841	4141.8936	2884.3486	2006.9916	1568.3131	1275.8607	1012.6536	6864.3809	6850.5811	6836.7808	6822.981	6809.1812	6788.4814	6740.1816	6698.7817	6560.7822	445.12643	387.89316	365.40866	342.92413	324.52774	312.26346	293.86703	273.42657	250.94208	2546.5073	2071.3306	1701.7487
249	1	2	0	0	1	1	0	0	0	0	5854.8975	5607.0518	5160.9297	4466.9624	3475.5801	2533.7671	1889.3685	1591.9539	1393.6775	6160.002	6081.5176	6022.6543	5963.791	5924.5488	5885.3071	5826.4438	5630.2334	5198.5698	6198.2144	6101.979	6049.4868	6005.7437	5970.749	5944.5029	5909.5083	5874.5137	5795.7759	1493.619	1396.2469	1320.5131	1255.5984	1206.9124	1158.2263	1114.9498	1066.2638	1012.1682	3061.2876	2286.3235	1957.5509
250	2	2	0	0	1	1	0	0	0	0	4601.0605	4031.6296	3441.1089	3061.4883	2892.7681	2766.228	2639.6877	2534.2375	2407.6975	6739.9453	6454.2202	6144.6851	5763.7183	5382.7515	4882.7324	4311.2822	3692.2114	3049.3301	7265.7354	7204.2539	7127.4028	7035.1807	6927.5889	6819.9971	6666.2939	6420.3691	5990.001	2845.4204	2731.8137	2597.5515	2452.9612	2287.7151	2101.8135	1895.256	1668.0427	1461.4852	2872.0093	2696.1021	2598.3757
251	1	1	0	0	1	1	1	0	0	0	6160.2007	6141.1162	6122.0317	6083.8628	6026.6094	5893.0176	5664.0034	4786.1157	3049.4243	6205.4536	6162.9287	6129.8535	6101.5034	6068.4287	6040.0786	6011.7285	5983.3784	5945.5786	6878.0034	6746.5151	6589.9819	6433.4487	6226.8247	6170.4727	6120.3818	6051.5073	5988.894	3981.4844	3551.6895	3290.0752	3084.5212	2953.7141	2822.907	2673.4131	2542.606	2374.4253	6061.3843	5970.7319	5766.7651
252	3	2	1	0	1	0	0	0	0	0	4722.1113	4444.875	4192.8423	3940.8091	3562.7593	2756.2537	2327.7974	1395.275	1067.6321	6133.771	5952.563	5771.355	5601.4727	5442.916	5295.6846	5125.8022	4933.2686	4695.4331	6118.9238	6043.4419	5974.2505	5892.4785	5816.9966	5722.6445	5622.002	5496.1992	5332.6553	2897.9146	2327.3953	1914.2606	1599.4913	1383.0875	1186.3567	910.93359	694.52972	438.77969	4927.2251	4441.3838	4048.0833
253	2	1	0	0	0	NA	0	1	0	0	1361.4762	1120.5804	984.422	827.31604	722.57874	617.84143	596.89398	502.6304	429.3143	5651.8838	5248.9878	4917.1904	4561.6938	4182.4971	3755.9011	3258.2056	2689.4106	2096.916	6397.4009	6354.457	6300.7778	6236.3623	6171.9473	6118.2676	6010.9092	5785.4556	5409.6997	843.62585	740.24744	649.27441	562.43658	492.13925	430.11221	384.6257	335.00409	285.38245	3283.5579	2793.8467	2402.0779
254	2	1	0	0	1	1	0	0	0	0	3416.9453	2320.5906	1611.1847	1396.2133	1310.2246	1245.7332	1159.7445	1095.2532	923.27594	6037.6895	5891.0703	5744.4507	5548.958	5304.5928	4962.481	4522.6226	3838.3989	2665.4438	7227.5337	7059.1431	6873.9131	6688.6831	6537.1313	6419.2573	6301.3838	6183.5103	5897.2456	1480.5383	1288.7682	1192.8832	1148.6284	1096.998	1045.3676	978.98566	897.85211	772.46393	1837.6151	1553.0223	1390.3979
255	3	2	0	0	1	0	0	0	0	0	6210.4683	5568.9717	4896.9277	4133.2417	3400.103	2880.7964	2453.1321	2086.5627	1475.6138	6734.8774	6550.0459	6388.3179	6203.4863	5995.5503	5718.3027	5348.6392	4840.3516	4124.1284	7151.9194	7135.1768	7084.9492	7017.979	6934.2666	6817.0684	6666.3857	6465.4751	6063.6538	2441.6672	2175.7017	1982.272	1837.1997	1692.1276	1571.234	1450.3405	1305.2683	1111.8386	3336.3157	2949.179	2678.1833
256	1	2	0	1	0	NA	0	0	0	0	2371.4402	1821.333	1505.0214	1298.7312	1119.9464	982.41968	886.15088	803.63483	734.87146	5680.8706	5498.3584	5247.4038	4996.4497	4631.4253	4289.2148	3924.1907	3422.282	2737.8613	7210.7036	6814.1763	6534.2744	6207.7222	5927.8208	5717.894	5484.6426	5134.7656	4598.2871	844.56348	777.27667	730.69348	699.638	668.58258	637.5271	606.47162	575.4162	539.18481	2451.3965	2022.9579	1743.5414
257	4	0	0	0	1	1	0	0	0	0	569.89008	485.28558	457.73993	422.3241	398.71353	365.26526	329.8494	290.49847	255.08263	5435.9707	5387.2881	5265.5815	4997.8267	3951.1492	2563.6926	1541.3564	1176.2363	811.11621	5546.666	5516.8032	5501.2749	5494.1079	5486.9409	5482.1626	5473.8013	5457.0781	5428.4102	468.93872	428.13153	391.03412	359.50128	340.95258	309.41974	276.03204	250.06383	231.51512	4534.7847	4065.0862	3496.5039
258	1	2	0	0	0	NA	0	0	0	0	2676.1648	1703.0555	1076.3071	779.42639	565.01245	449.55881	383.5853	334.10516	301.11841	6091.9604	5873.7695	5601.0313	5519.2095	5355.5664	5001.0063	4646.4463	4073.6951	3146.384	6501.7998	6484.4629	6467.1255	6449.7886	6397.7769	6345.7656	6207.0679	5929.6733	5270.8604	446.37152	394.3642	364.64572	346.07169	331.21243	316.35321	301.49396	282.91992	268.06067	2031.7572	1648.7063	1447.1006
[truncated: 170 more columns]
